# Supplementary material for: Corrosion engineering approach to rapidly prepare Ni(Fe)OOH/Ni(Fe)Sx nanosheet arrays for efficient water oxidation
Source: Royal Society of Chemistry journal article supplement (doi:10.1039/d2ta06319k), 2023-01-01
Supplement: d2ta06319k1.pdf [file d2ta06319k1.pdf]

## Corrosion Engineering Approach to Rapidly Preparing Ni(Fe)OOH/Ni(Fe)S<sub>x</sub> Nanosheet Array for Efficient Water Oxidation

Mingyue Chen, Wenhui Li, Yu Lu, Pengcheng Qi, Hao Wu, Gaofu Liu, Yue Zhao, and Yiwen Tang\*

Institute of Nano-Science & Technology, College of Physical Science and Technology, Central China Normal University,  
Wuhan 430079, China

\*Corresponding author: Tel.: +86-27-67867947; Fax: +86-27-67861185;

E-mail: [ywtang@ccnu.edu.cn](mailto:ywtang@ccnu.edu.cn)

### Experimental Section

**Materials and chemicals:** Ni foam (NF), Fe foam (FF), and NiFe alloy foam (NFF), Nickel chloride hexahydrate (NiCl<sub>2</sub>·6H<sub>2</sub>O, Sinopharm Chemical ReagentCo., Ltd, shanghai), Ferric trichloride hexahydrate (FeCl<sub>3</sub>·6H<sub>2</sub>O, Sinopharm Chemical ReagentCo., Ltd, shanghai), ammonium persulfate ((NH<sub>4</sub>)<sub>2</sub>S<sub>2</sub>O<sub>8</sub>, Sinopharm Chemical ReagentCo., Ltd, shanghai), thiourea ((NH<sub>2</sub>)<sub>2</sub>CS, Sinopharm Chemical ReagentCo., Ltd, shanghai) were used. All reagents were of analytical pure grade and were not further processed.

**Synthesis of Ni(Fe)OOH/Ni(Fe)S<sub>x</sub> nanosheet arrays.** Solution was formed by mixing (NH<sub>4</sub>)<sub>2</sub>S<sub>2</sub>O<sub>8</sub> (3 mmol), (NH<sub>2</sub>)<sub>2</sub>CS (4 mmol), and FeCl<sub>3</sub> (1 mmol) in 10 mL of deionized (DI) water. NiFe foam with dimension of 1\*4 cm<sup>2</sup> was immersed in the mixed solution. After 10 minutes, the NiFe foam was taken out, washed with DI water and absolute ethanol three times, and then dried with a blower. The prepared sample was marked as Ni(Fe)OOH/Ni(Fe)S<sub>x</sub>. When the molar amount of (NH<sub>4</sub>)<sub>2</sub>S<sub>2</sub>O<sub>8</sub> in the mixed solution became 4 mmol, 2 mmol, and 1mmol, under the same synthesis conditions, the prepared samples were marked as Ni(Fe)OOH/Ni(Fe)S<sub>x</sub>-4, Ni(Fe)OOH/Ni(Fe)S<sub>x</sub>-2, and Ni(Fe)OOH/Ni(Fe)S<sub>x</sub>-1, respectively. When solution was formed by mixing (NH<sub>4</sub>)<sub>2</sub>S<sub>2</sub>O<sub>8</sub> (3 mmol), (NH<sub>2</sub>)<sub>2</sub>CS (4 mmol), NiCl<sub>2</sub>·6H<sub>2</sub>O (1 mmol) in 10 mL of DI water, the sample prepared after 10 minutes of etching is marked as Ni(Fe)OOH/Ni(Fe)S<sub>x</sub>-Ni. When solution was formed by mixing (NH<sub>4</sub>)<sub>2</sub>S<sub>2</sub>O<sub>8</sub> (3 mmol) and (NH<sub>2</sub>)<sub>2</sub>CS (4 mmol) in 10 mL of DI water, the sample prepared after 10 minutes of etching is marked as Ni(Fe)OOH/Ni(Fe)S<sub>x</sub>-

H<sub>2</sub>O.

**Synthesis of NiOOH/NiS<sub>x</sub> and FeOOH/FeS<sub>x</sub>.** (NH<sub>4</sub>)<sub>2</sub>S<sub>2</sub>O<sub>8</sub> (3 mmol), (NH<sub>2</sub>)<sub>2</sub>CS (4 mmol), and FeCl<sub>3</sub> (1 mmol) were dissolved in 10 mL of DI water to form a corrosion solution. Then the Fe foam with an area of 1\*4 cm<sup>2</sup> was immersed in the corrosion solution, after 10 minutes, the etched Fe foam was taken out and washed with DI water and absolute ethanol three times, and then dried with a blower, the sample was marked as FeOOH/FeS<sub>x</sub>. (NH<sub>4</sub>)<sub>2</sub>S<sub>2</sub>O<sub>8</sub> (3 mmol) and (NH<sub>2</sub>)<sub>2</sub>CS (4 mmol) were dissolved in 10 mL of DI water to form a corrosion solution. Then the Ni foam with an area of 1\*4 cm<sup>2</sup> was immersed in the corrosion solution, after 10 minutes, the etched Ni foam was taken out and washed with DI water and absolute ethanol three times, and then dried with a blower, the sample was marked as NiOOH/NiS<sub>x</sub>.

**Synthesis of Ni(Fe)OOH.** (NH<sub>4</sub>)<sub>2</sub>S<sub>2</sub>O<sub>8</sub> (3 mmol) and NaOH (9 mmol) were dissolved in 10 mL of DI water to form a corrosion solution, then the NiFe foam with an area of 1\*4 cm<sup>2</sup> was immersed in the corrosion solution, after 24 h, the etched NiFe foam was taken out and washed with DI water and absolute ethanol three times, and dried with a blower, the sample was marked as Ni(Fe)OOH.

**Synthesis of Mo<sub>2</sub>C/MoO<sub>2</sub>/MoNi<sub>4</sub>.** NiMoO<sub>4</sub> arrays were constructed on nickel foam through a hydrothermal reaction. In brief, 2 mmol Ni(NO<sub>3</sub>)<sub>2</sub>•6H<sub>2</sub>O and 0.5 mmol (NH<sub>4</sub>)<sub>6</sub>Mo<sub>7</sub>O<sub>24</sub>•4H<sub>2</sub>O were dissolved in 50 ml of DI water in a Teflon liner at room temperature, then the treated Ni foam substrate (2\*5 cm<sup>2</sup>) was immersed in this solution and heated 150 °C for 6 h, after cooling down room temperature, the NiMoO<sub>4</sub>/NF was taken out and washed with DI water and ethanol, followed by drying with a blower. Finally, Mo<sub>2</sub>C/MoO<sub>2</sub>/MoNi<sub>4</sub> was obtained through a one-step annealing process. Specifically, a quartz crucible containing 1 ml ethanol was placed on the upper end of the tube furnace, wherein ethanol was used as a reducing agent and a carbon source, and NiMoO<sub>4</sub> arrays were placed in the middle of the tube furnace and heated at 600 °C for 2 h in a N<sub>2</sub> atmosphere, and then, the Mo<sub>2</sub>C/MoO<sub>2</sub>/MoNi<sub>4</sub> electrocatalyst was obtained.

**Characterizations.** The morphologies and elemental analysis of the samples were examined by scanning electron microscopy (SEM, JSM-7900, JEOL ) equipped with an energy dispersive X-ray spectroscopy (EDS, Oxford). The surface chemical composition and valence states of the elements were measured by X-ray photoelectron spectroscopy (XPS,

Thermo VG Multilab 2000) with X-ray radiation of 1486.6 eV and assigning the C 1s peak to 284.6 eV. The crystalline phases and elemental analysis of the samples were analyzed by Transmission electron microscopy (TEM, JEM-F200, JEOL) equipped with an ESD. Contact angle was measured on XG-CAMB3 (CA, Xuanzhun instrument, XG-CAMB3, China). Raman spectrum of the electrodes were collected on HORIBA LabRAM Spectrometer with the laser of 532 nm. Atomic force microscopy (AFM, Multimode Nanoscope IIIa, Veeco Instruments) was used to determine the thickness of the electrode materials.

**Electrochemical measurements.** OER performances of all samples were investigated in a three-electrode cell containing in 1 M KOH aqueous solution. The prepared samples were used as the working electrode, a graphite rod as the counter electrode, and Hg/HgO (contains 1M KOH solution) is used as the reference electrode. Linear sweep voltammetry (LSV), cyclic voltammetry (CV), and chronopotentiometry tests were performed to evaluate the OER activity and long-term stability of the samples on an electrochemical workstation (Chenhua instrument, CHI660E, Shanghai Chenhua Instrument Co. Ltd., China). Electrochemical impedance spectroscopy (EIS) measurements were conducted in a frequency range from 100 kHz to 0.01 Hz with an AC potential amplitude of 5 mV on an electrochemical workstation (CHI660E). Before the electrochemical test, the electrolyte was bubbled with high-purity Ar for over 10 minutes to remove the dissolved oxygen in the KOH aqueous solution. All potentials in this work refer to Reversible Hydrogen Electrode (RHE) by converting the value ( $E_{\text{RHE}} = E_{\text{test}} + E_{\text{Hg/HgO}} + 0.059 \times \text{pH}$ ) with iR-compensation, the R value was determined by the EIS test. In addition, the RHE potential was calibrated by the initial potential of the hydrogen evolution reaction (HER) of metal Pt in 1 M KOH aqueous solution. And the overpotential ( $\eta$ ) of OER was calculated with the equation:

$$\eta_{\text{OER}} = E_{\text{RHE}} - 1.23$$

Overpotential of HER was calculated with the equation:

$$\eta_{\text{HER}} = 0 - E_{\text{RHE}}$$

The electrochemical active surface area (ECSA) were investigated using the double layer capacitances ( $C_{dl}$ ). The specific capacitance for a 3D metal foam (Ni foam; Fe foam; and NiFe foam) surface is supposed to be about  $60 \mu\text{F cm}^{-2}$ , and the ECSA is estimated by the following formule:

$$\text{ECSA} = C_{dl}(\mu\text{F cm}^{-2})/60\mu\text{F cm}^{-2} \text{ per cm}^2 \text{ ECSA}$$

**Calculation of faradaic efficiency:** Faradaic efficiency (FE) for OER was determined using a drainage method at room temperature. Briefly, the Ni(Fe)OOH/Ni(Fe)<sub>x</sub>S<sub>x</sub> worked at a constant current density of 50 mA cm<sup>-2</sup> in 1 M KOH aqueous solution and the volume (V) of gas products was recorded every 20 min. FE was calculated based on the equation:  $\text{FE} = V / [V_m \times I \times t / (n \times F)] \times 100\%$ , where V is the volume of the gas products (L), V<sub>m</sub> is the standard molar volume (24.4 L mol<sup>-1</sup>), I is the current (A), t is the time (s), n is the number of electrons involved in generating one molecule of a gas product (4 for oxygen gas), and F is the Faraday constant (96485.3 C mol<sup>-1</sup>).

**Calculation of TOF:** the turnover frequency (TOF) value of OER was estimated using the following equation

$$\text{TOF} = [\text{Number of total oxygen turn overs} / \text{geometrical area (cm}^2)] / [\text{Number of surface active sites} / \text{geometrical area (cm}^2)]$$

The total number of oxygen turn overs:

$$\begin{aligned} \text{Number of O}_2 &= [j \text{ (mA cm}^{-2})] \times [(1 \text{ C s}^{-1}) / 1000 \text{ mA}] \times [(6.02 \times 10^{23} \text{ O}_2 \text{ molecules}) / (1 \text{ mol O}_2)] \times [(1 \text{ mol e}^-) / 96485.3 \\ &\text{C}] \times [(1 \text{ mol O}_2) / (2 \text{ mol e}^-)] \\ &= 1.56 \times 10^{15} \text{ O}_2 \text{ s}^{-1} / \text{cm}^2 \end{aligned}$$

The number of active sites as the total number of the surface sites was estimated from the roughness factor together with the unit cell of the catalysts, which will validly evaluate the actual TOF. The surface active sites per unit of actual surface area can be calculated using the following equations:

$$\text{Number of active sites} = [(\text{Number of atoms per unit cell}) / (\text{Volume per unit cell})]^{2/3}$$

$$\text{Number of active sites (NiOOH)} = [(12 \text{ atoms per unit cell}) / (141.46 \text{ \AA}^3 \text{ per unit cell})] = 1.93 \times 10^{15} \text{ atoms cm}^{-2}$$

$$\text{Number of active sites (FeOOH)} = [(16 \text{ atoms per unit cell}) / (138.62 \text{ \AA}^3 \text{ per unit cell})] = 2.37 \times 10^{15} \text{ atoms cm}^{-2}$$

$$\text{Number of active sites (Ni}_3\text{S}_8) = [(68 \text{ atoms per unit cell}) / (977.8 \text{ \AA}^3 \text{ per unit cell})] = 1.69 \times 10^{15} \text{ atoms cm}^{-2}$$

Thus, the number of the active sites for NiFeOOH/NiFeS<sub>x</sub> is around  $2.00 \times 10^{15}$  atoms cm<sup>-2</sup> and that for NiOOH/NiS<sub>x</sub> is around  $1.81 \times 10^{15}$  atoms cm<sup>-2</sup>. In the FeOOH/FeS<sub>x</sub> electrode material, the surface FeS<sub>x</sub> is oxidized to sulfate with low content, therefore, the number of the active sites for FeOOH/FeS<sub>x</sub> is equated to the number of active sites of FeOOH, and the number



of active sites is  $2.37 \times 10^{15}$  atoms  $\text{cm}^{-2}$ . The number of the active sites for Ni(Fe)OOH is around  $2.15 \times 10^{15}$  atoms  $\text{cm}^{-2}$ .

The plots of current density can be converted into TOF plots using the following formula:

$$\text{TOF}_{\text{OER}} = [1.56 \times 10^{15} \text{ O}_2 \text{ s}^{-1}/\text{cm}_2 \times j] / (\text{Number of active sites} \times \text{ECSA})$$

Figures and Tables

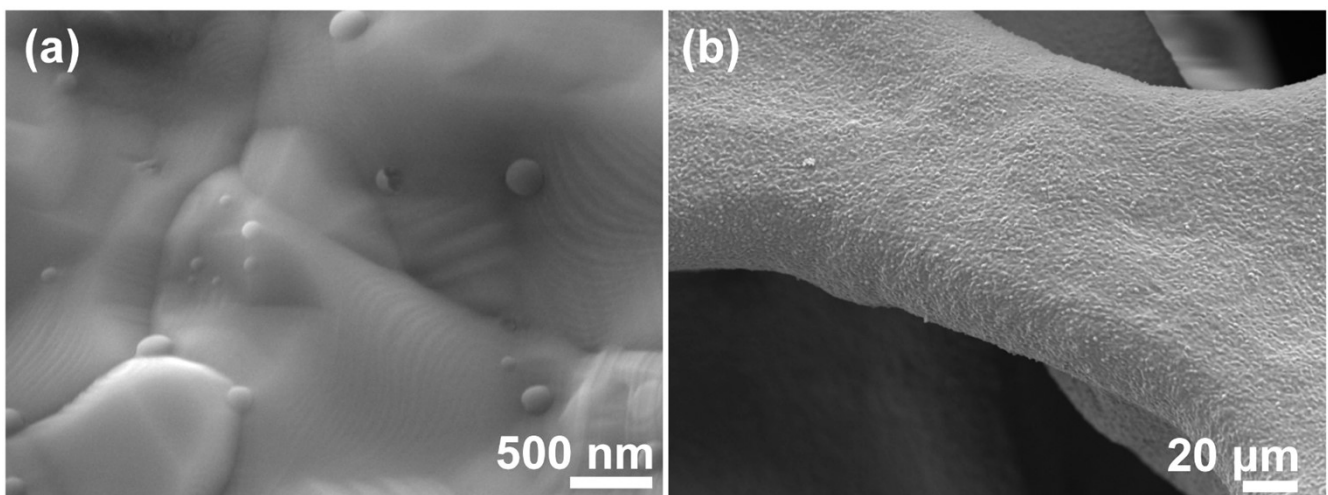

Figure s1 SEM images of NiFe foam.

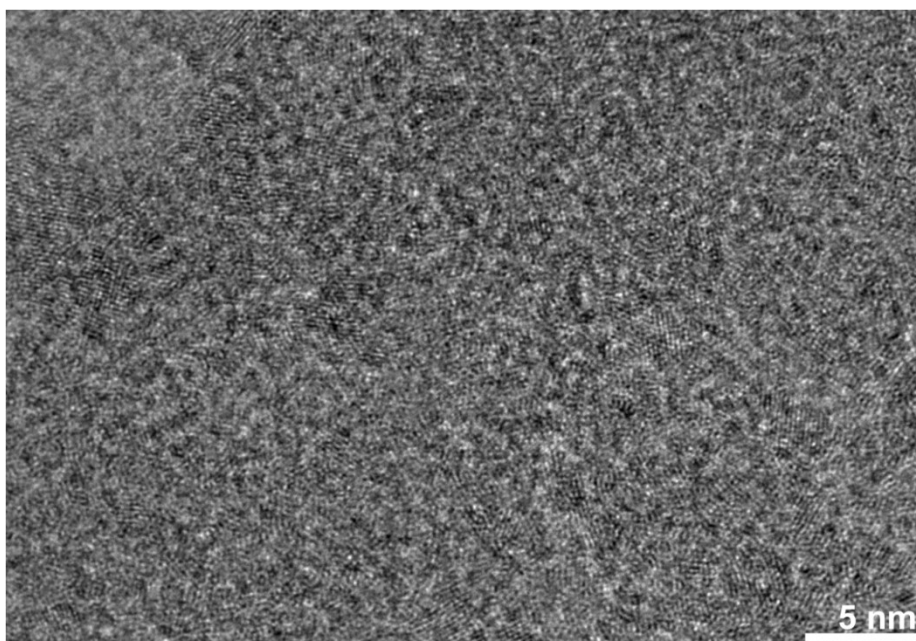

Figure s2 HRTEM image of the Ni-Fe composites nanosheets array on the surface of NiFe foam.

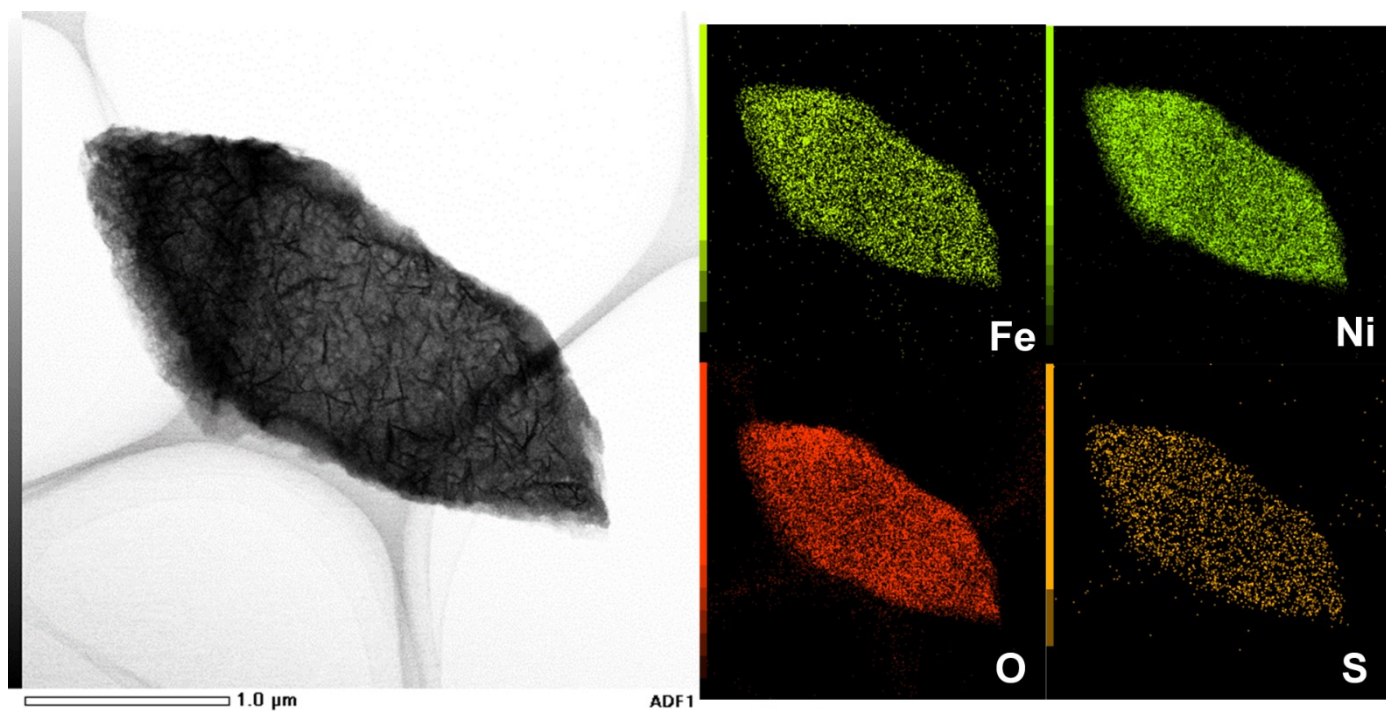

Figure s3 STEM image of the Ni-Fe composites nanosheets array and the corresponding elemental mapping images.

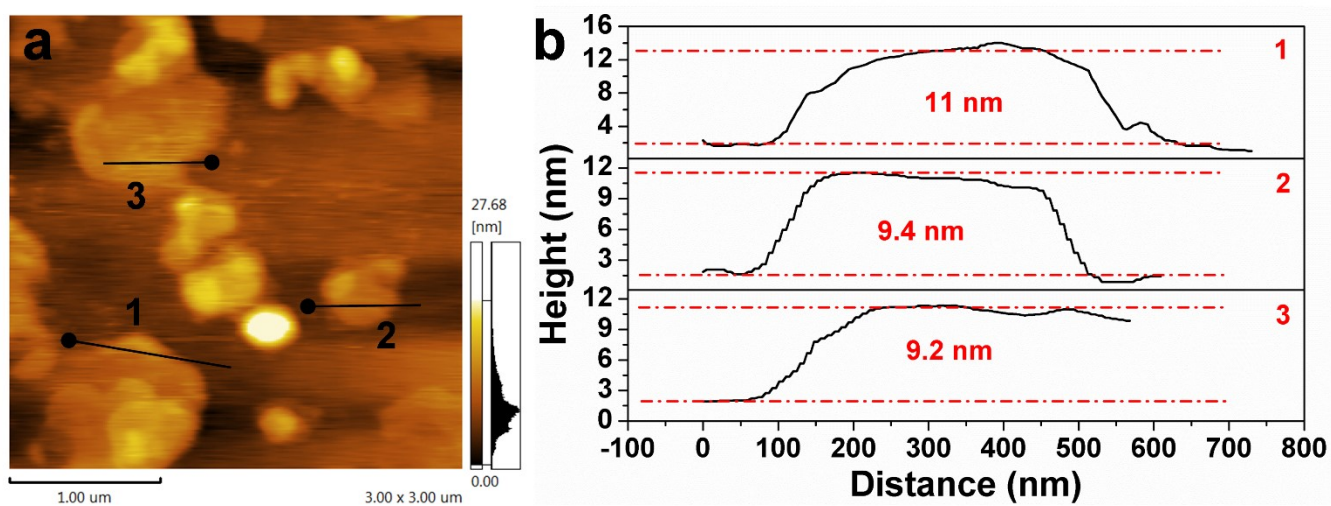

Figure s4 (a) AFM height profiles of Ni(Fe)OOH/Ni(Fe)S<sub>x</sub>; the numbers 1–3 in (a) correspond to the profiles 1–3 in (b).

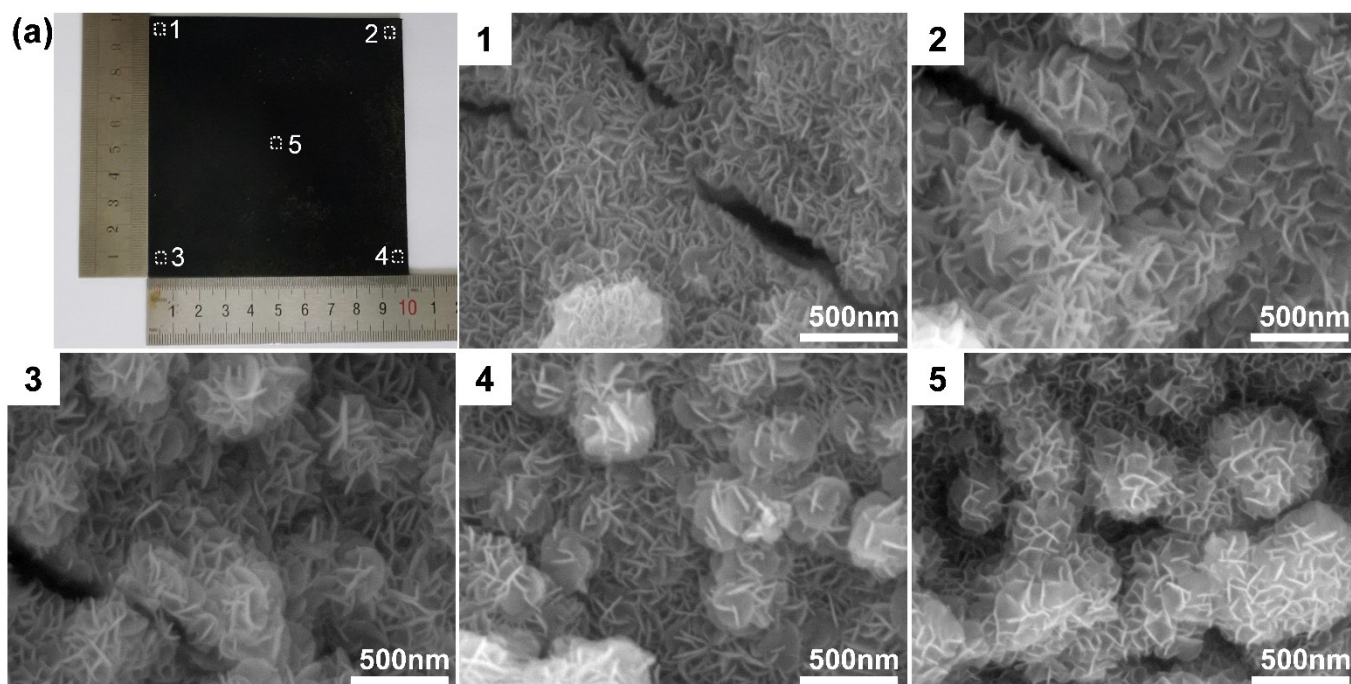

Figure s5 Digital image of a material (10X10 cm<sup>2</sup>) obtained from a scaled-up corrosion engineering in the aqueous solution containing (NH<sub>4</sub>)<sub>2</sub>S<sub>2</sub>O<sub>8</sub>, (NH<sub>2</sub>)<sub>2</sub>CS, and FeCl<sub>3</sub> and the corresponding SEM images of the representative areas 1-5.

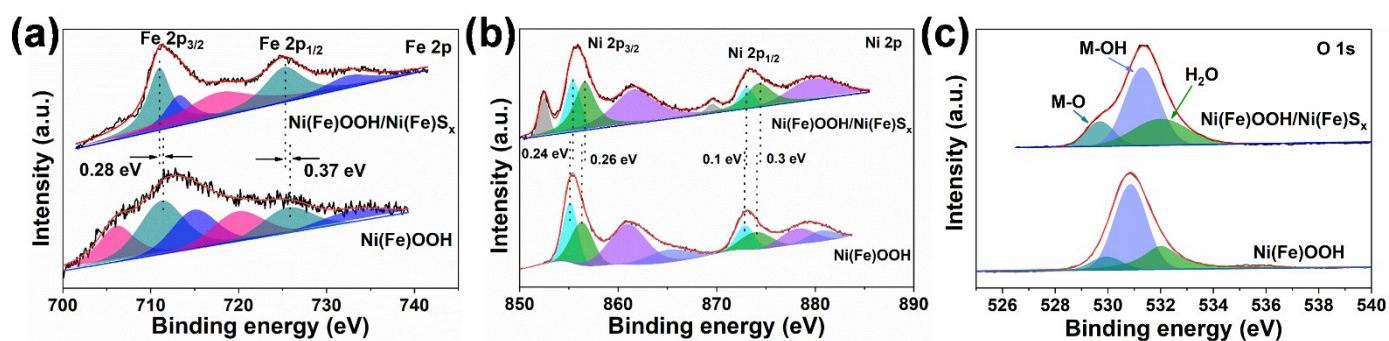

Figure s6 High-resolution (a) Fe 2p, (b) Ni 2p, and (c) O 1s of Ni(Fe)OOH/Ni(Fe)S<sub>x</sub> and Ni(Fe)OOH.

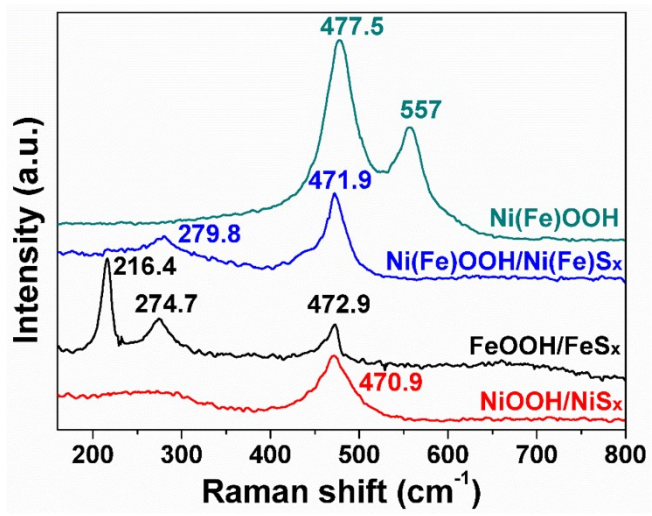

Figure s7 Raman spectra of various samples.



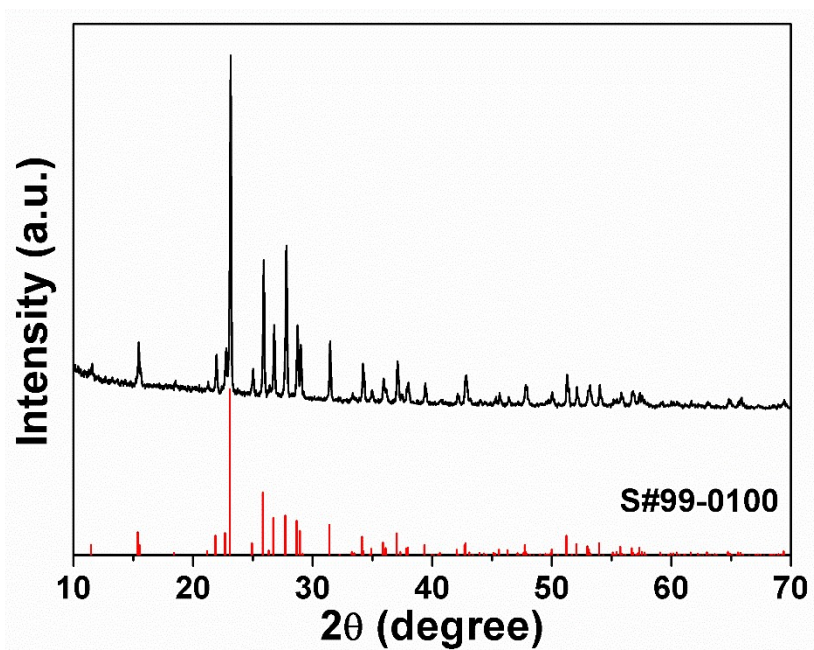

Figure s8 XRD patterns of the S .

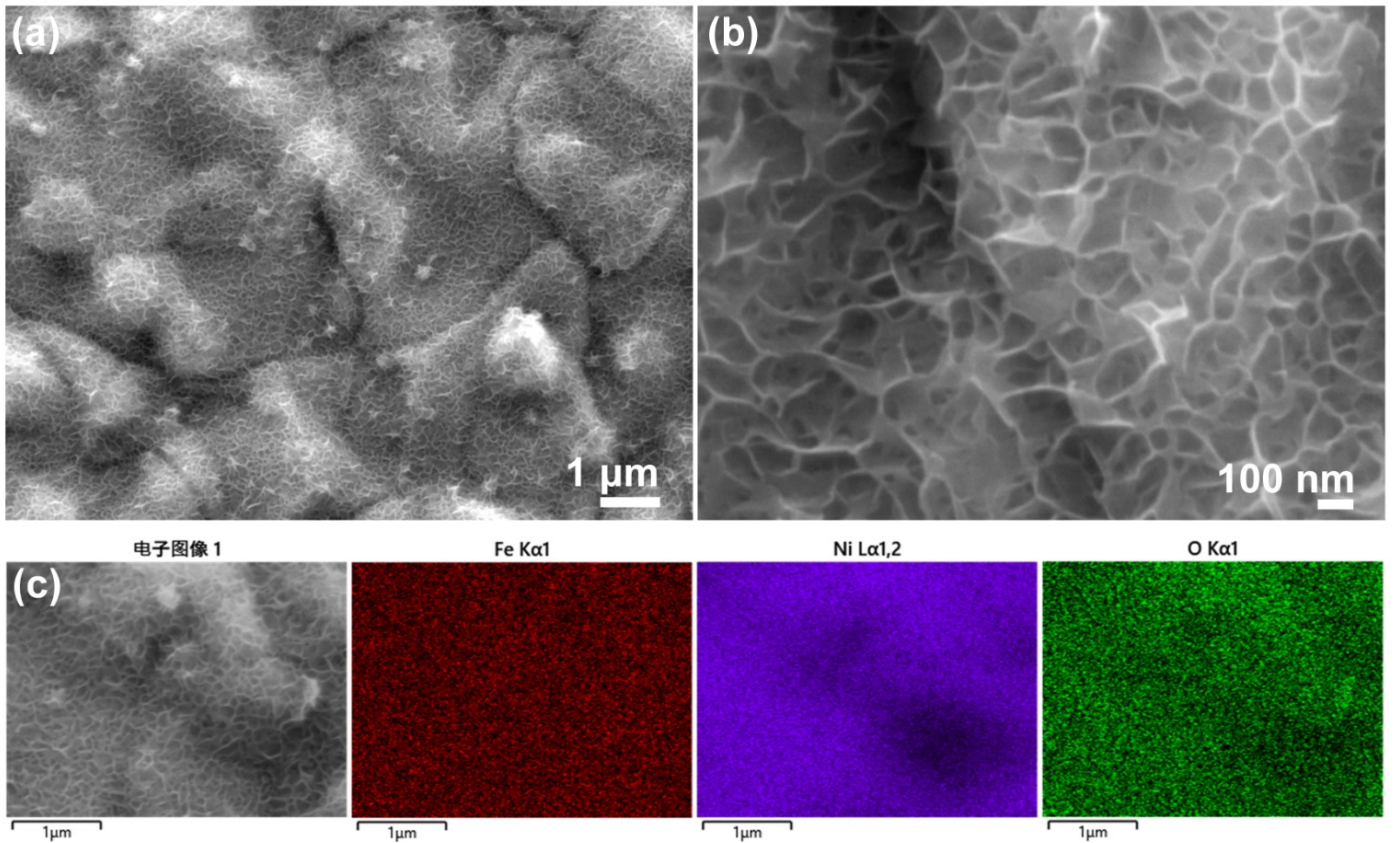

Figure s9 (a), (b) SEM images of the Ni(Fe)OOH and (c) corresponding elemental mapping images.

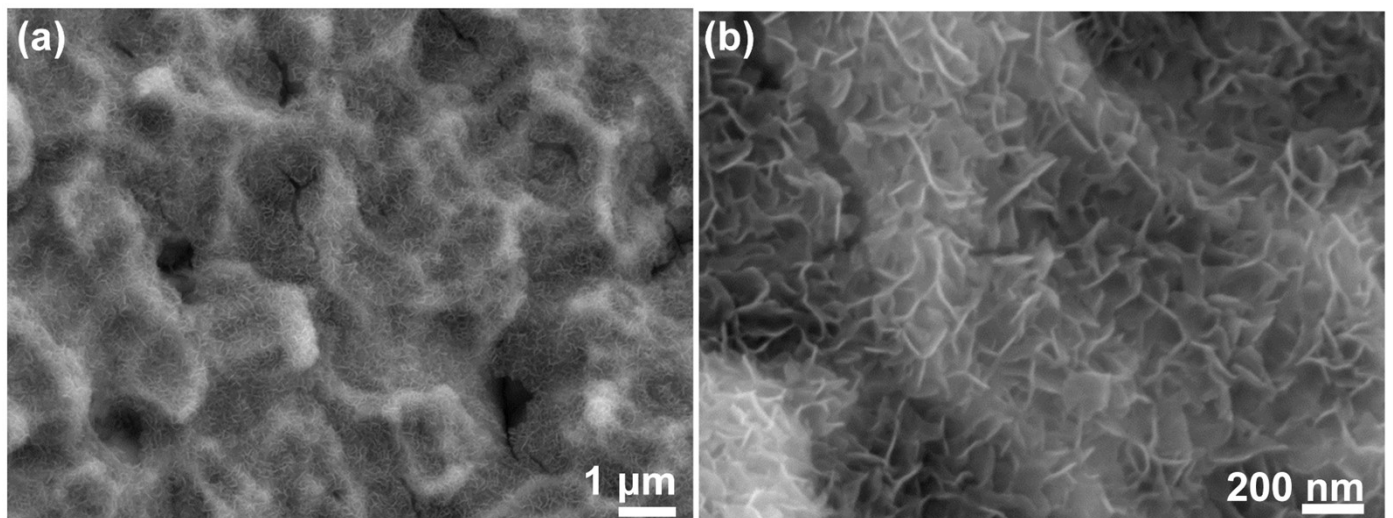

Figure s10 (a), (b) SEM images of the Ni(Fe)OOH/Ni(Fe)S<sub>x</sub>-Ni



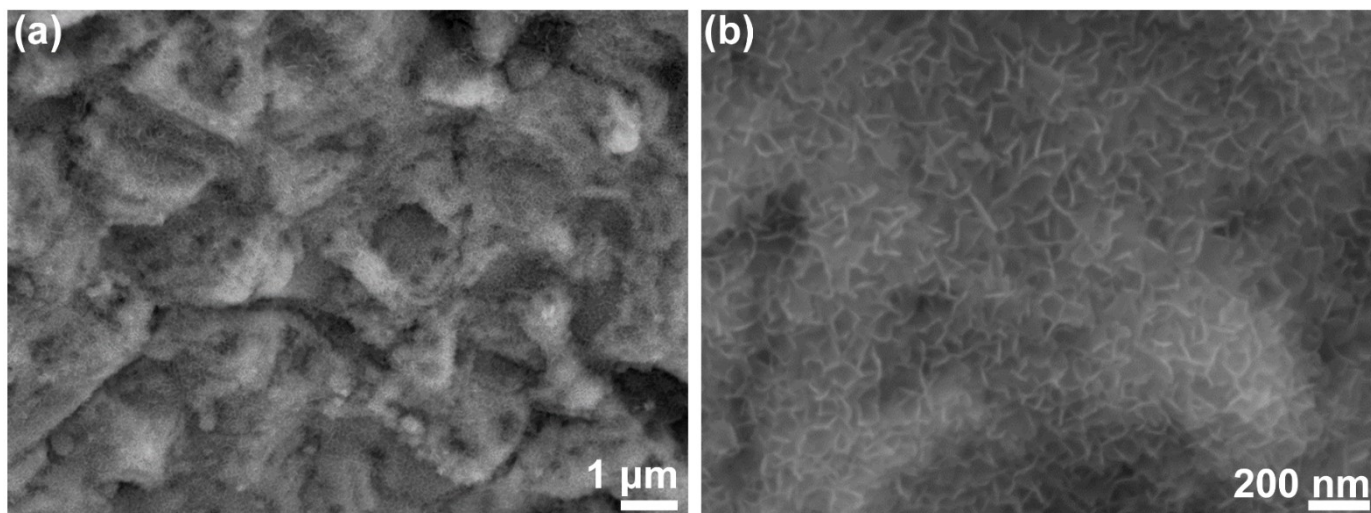

Figure s11 (a), (b) SEM images of the Ni(Fe)OOH/Ni(Fe) $S_x$ -H $_2$ O.

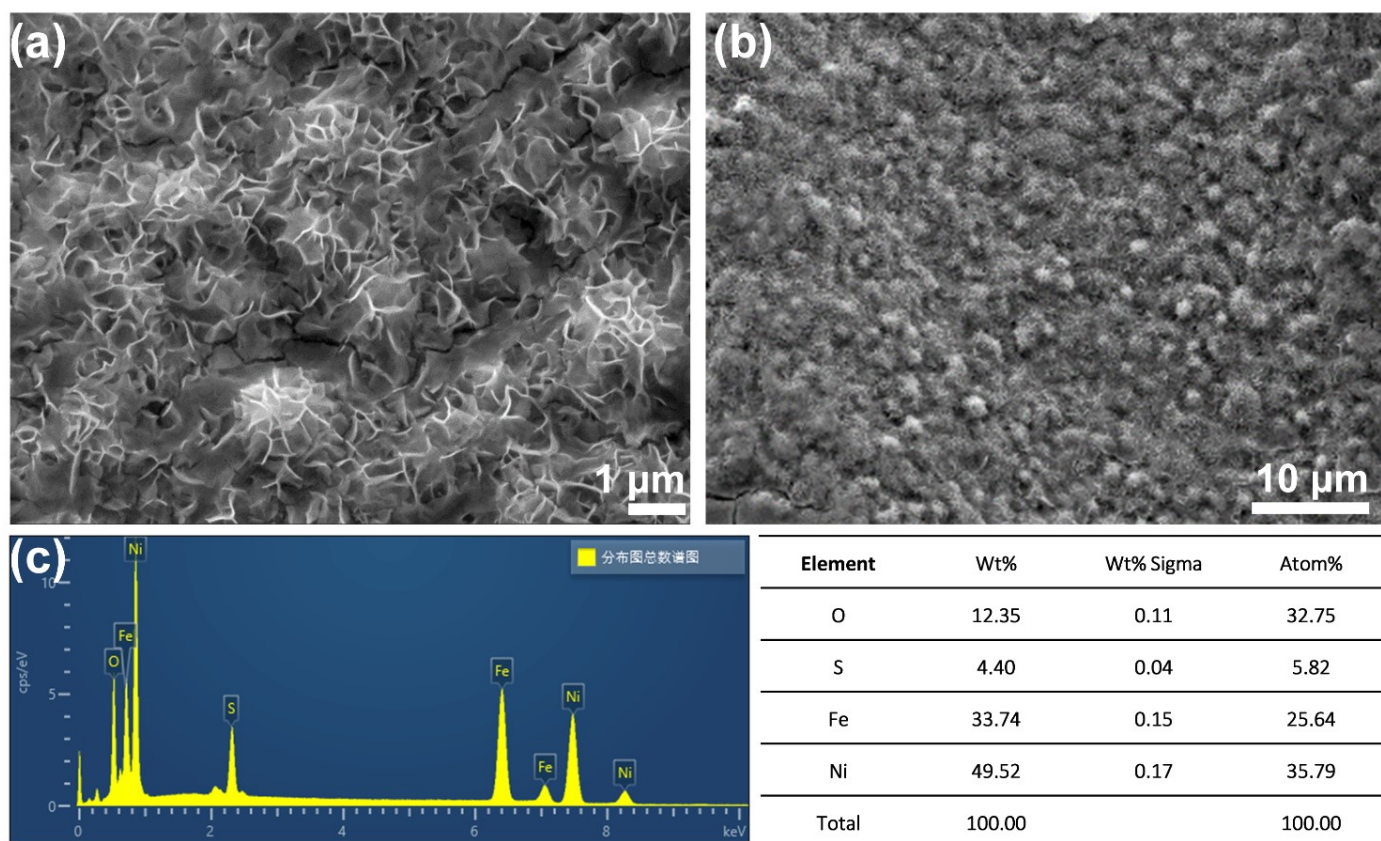

Figure s12 (a), (b) SEM images of the Ni(Fe)OOH/Ni(Fe) $S_x$ -1; (c) EDS analysis of Ni(Fe)OOH/Ni(Fe) $S_x$ -1 and corresponding element ratios.



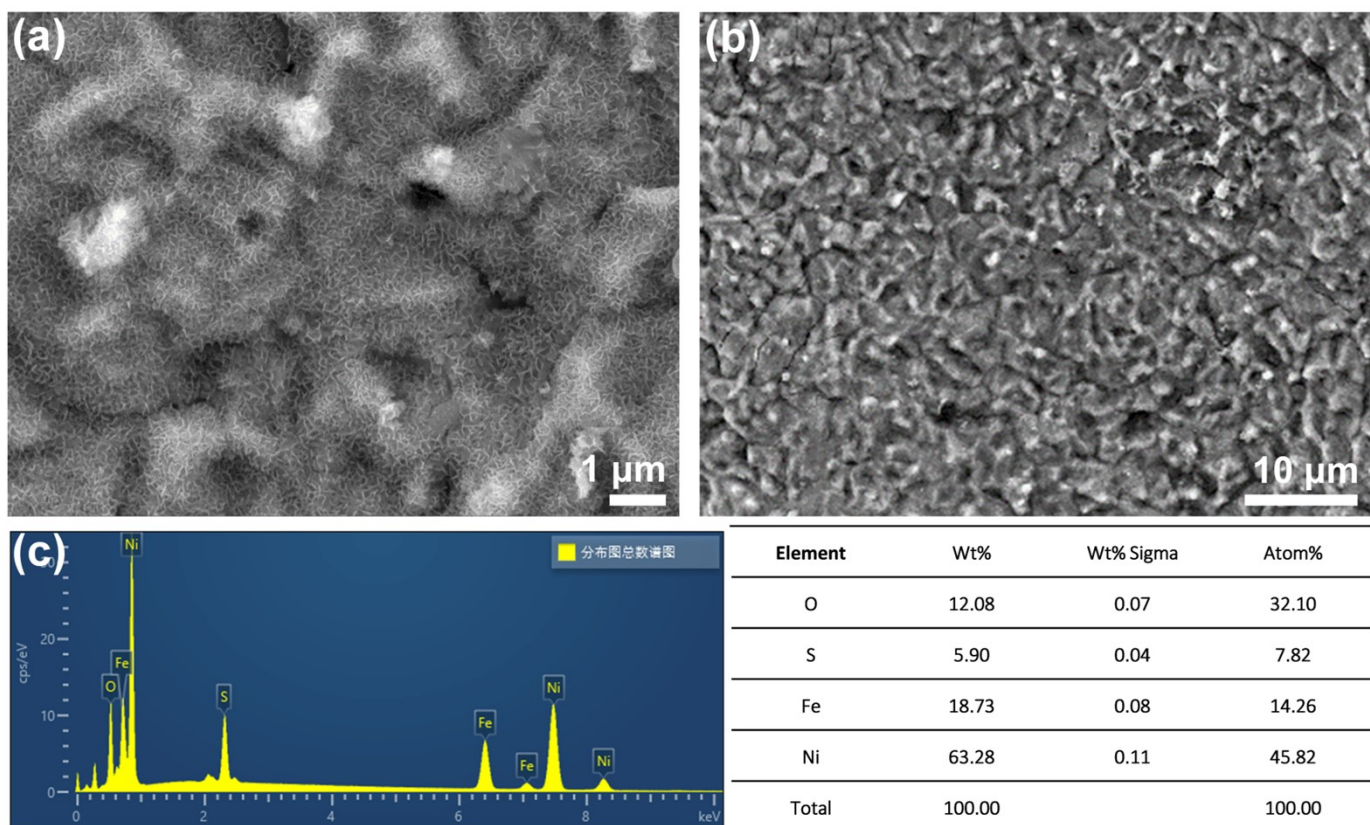

Figure s13 (a), (b) SEM images of the Ni(Fe)OOH/Ni(Fe)S<sub>x</sub>-2; (c) EDS analysis of Ni(Fe)OOH/Ni(Fe)S<sub>x</sub>-2 and corresponding element ratios.

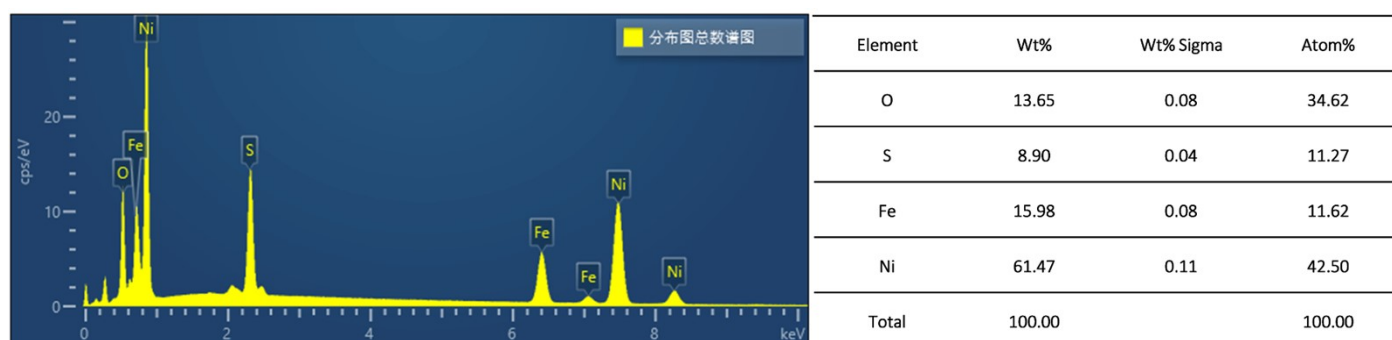

Figure s14 EDS analysis of Ni(Fe)OOH/Ni(Fe)S<sub>x</sub> and corresponding element ratios.

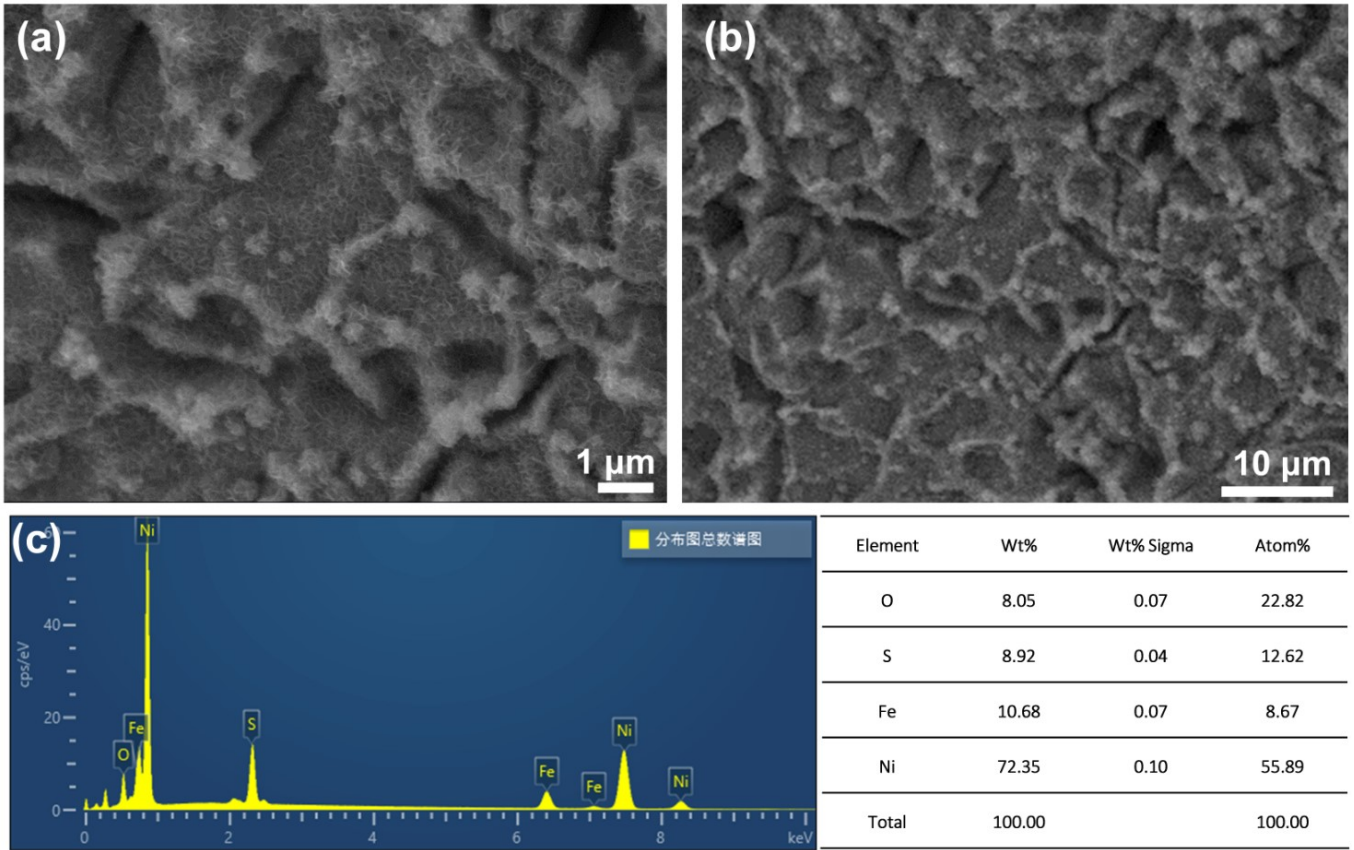

Figure s15 (a), (b) SEM images of the Ni(Fe)OOH/Ni(Fe)S<sub>x</sub>-4; (c) EDS analysis of Ni(Fe)OOH/Ni(Fe)S<sub>x</sub>-4 and corresponding element ratios.

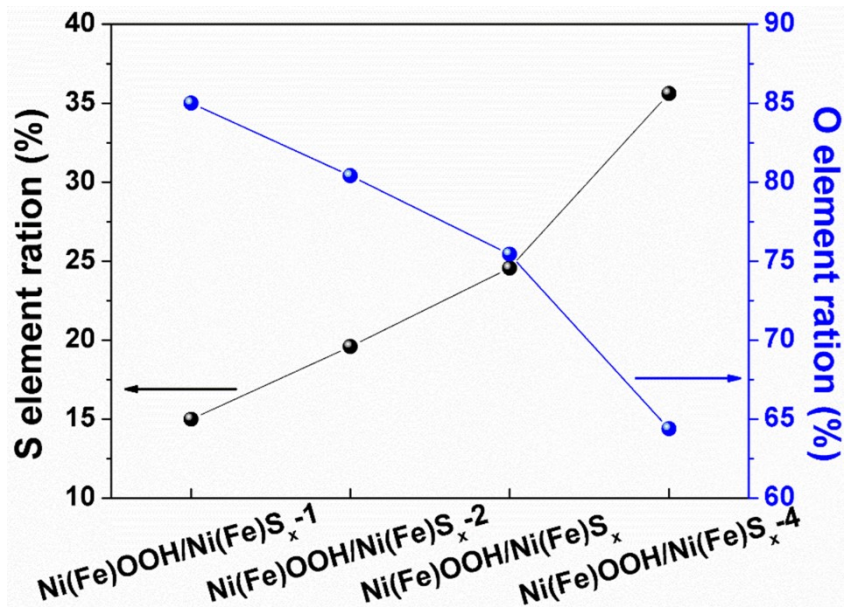

Figure s16 the content of O and S elements in the samples

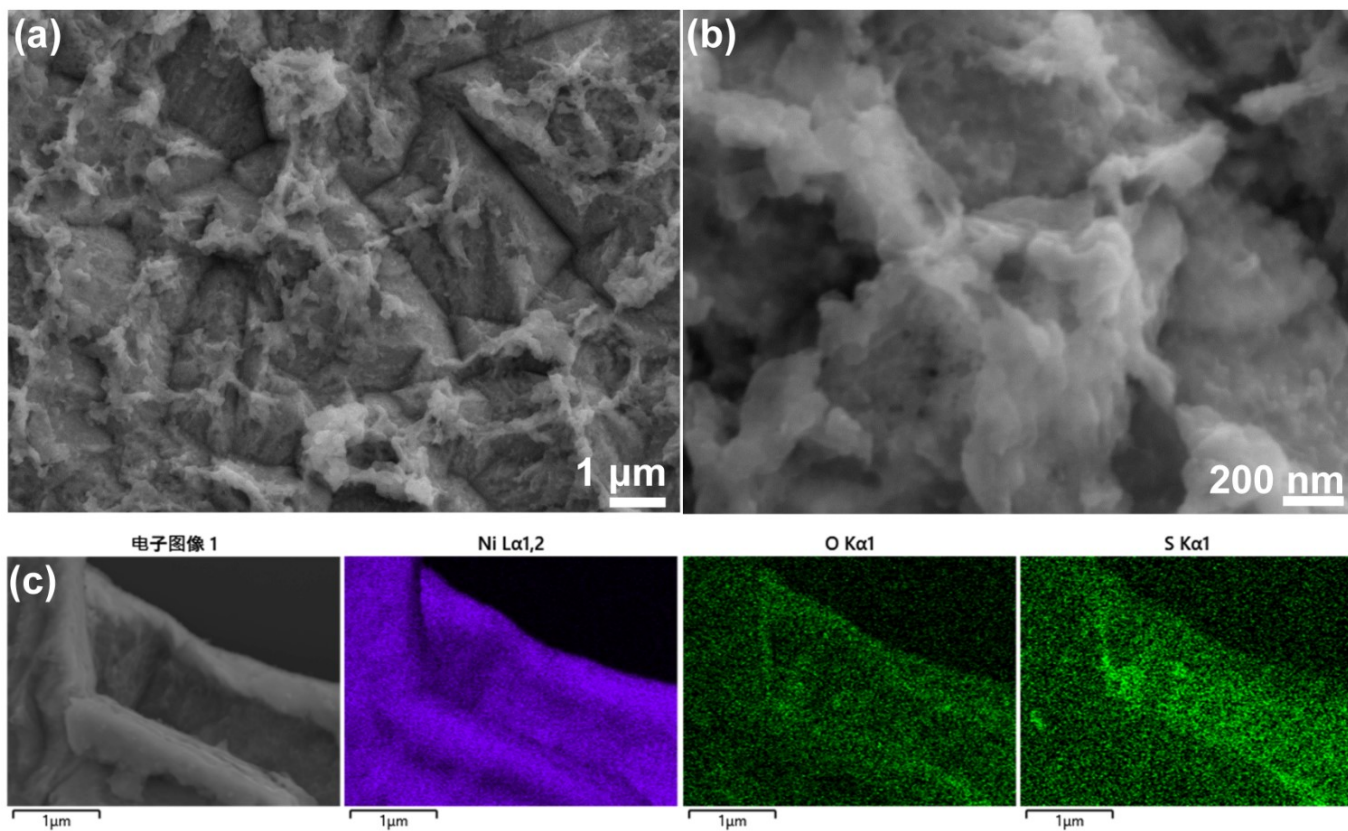

Figure s17 (a), (b) SEM images of the NiOOH/NiS<sub>x</sub> and (c) corresponding elemental mapping images.



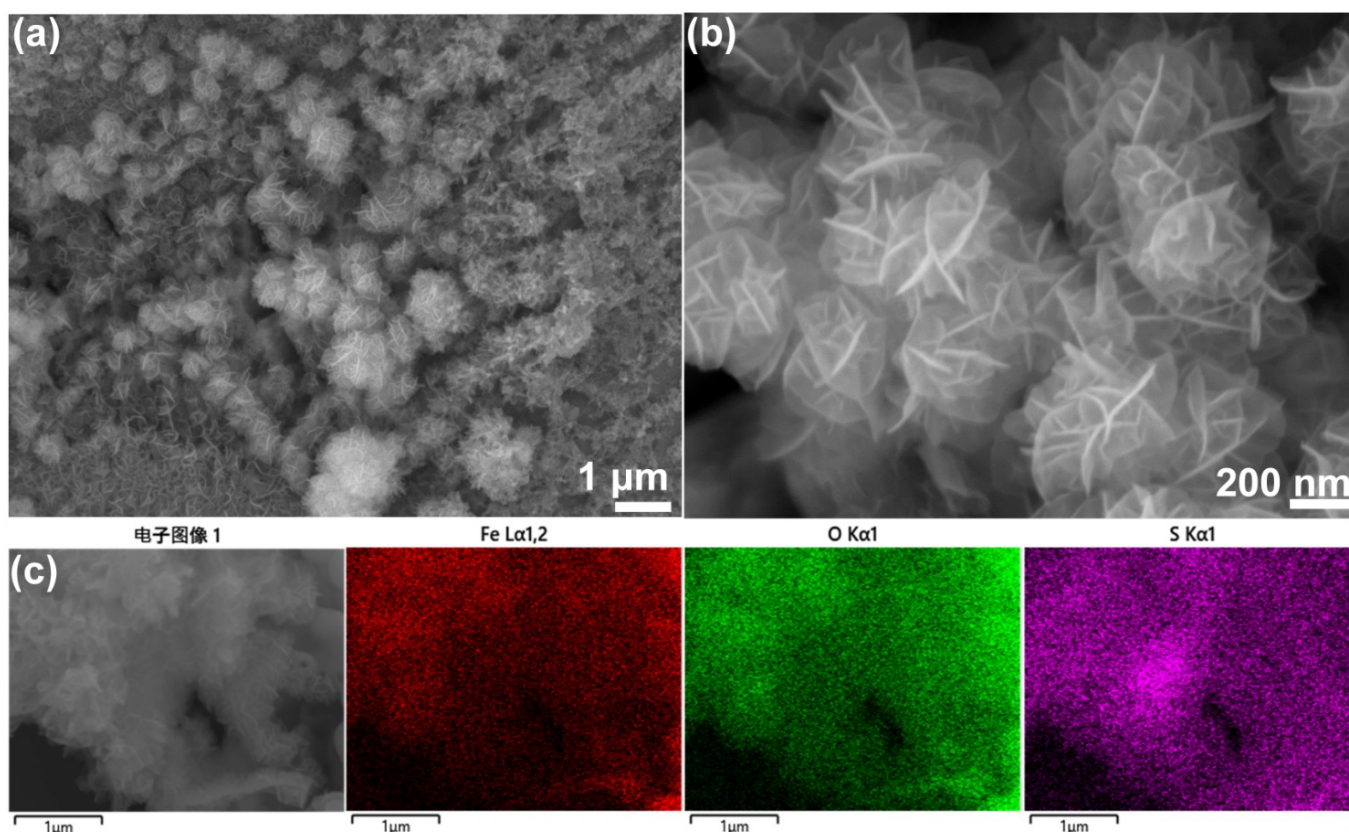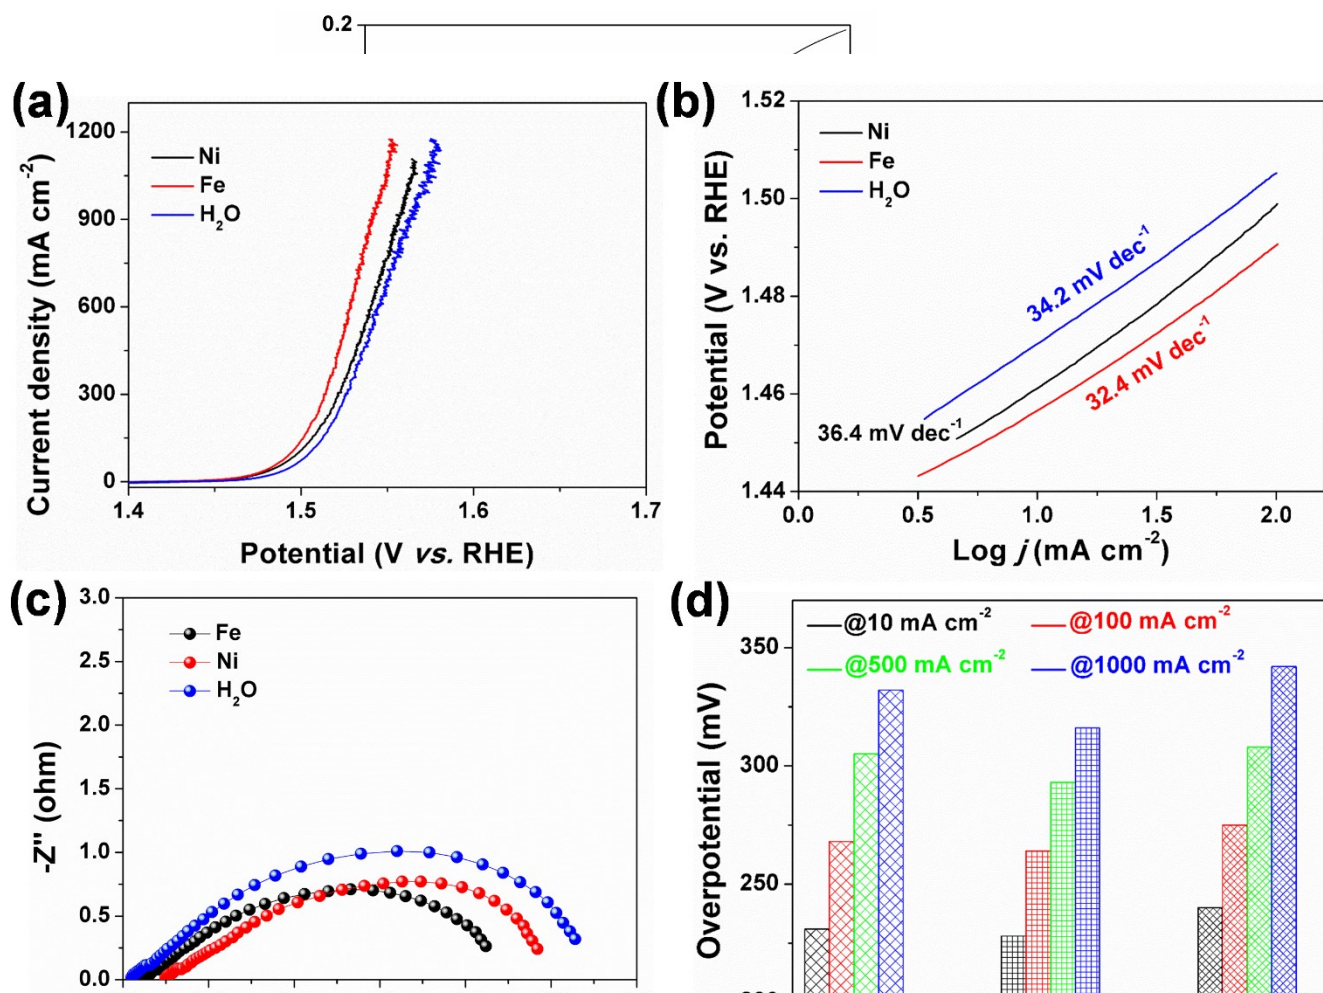

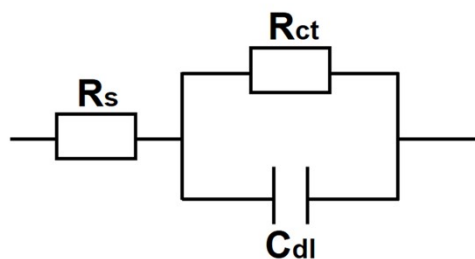

Figure s21 Equivalent circuit for the EIS Nyquist plots. ( $R_s$ : series resistance;  $R_{ct}$ : charge transfer resistance; and  $C_{dl}$ : interface capacitance.)

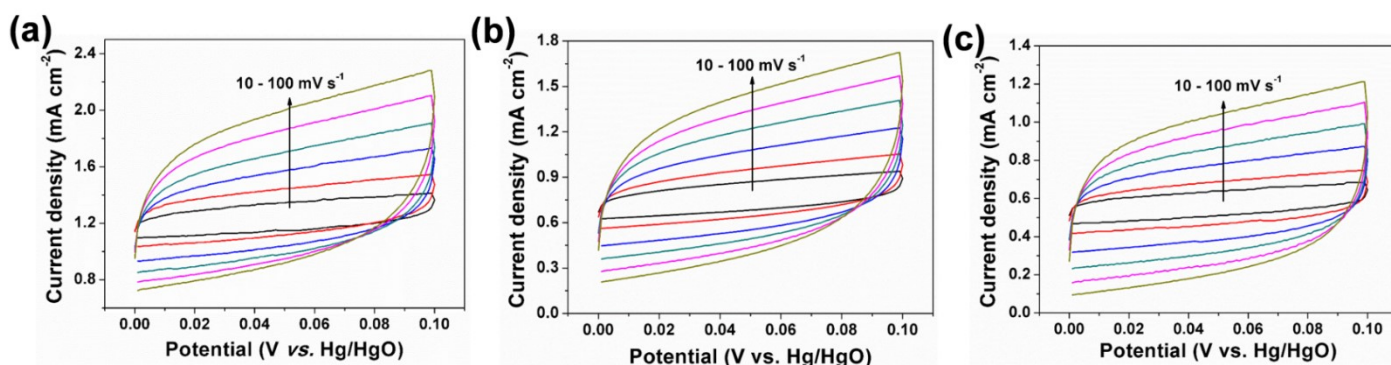

Figure s22 Cyclic voltammograms measured at different scan rates for (a) Ni(Fe)OOH/Ni(Fe)S<sub>x</sub>-Ni, (b) Ni(Fe)OOH/Ni(Fe)S<sub>x</sub>, and (c) Ni(Fe)OOH/Ni(Fe)S<sub>x</sub>-H<sub>2</sub>O.

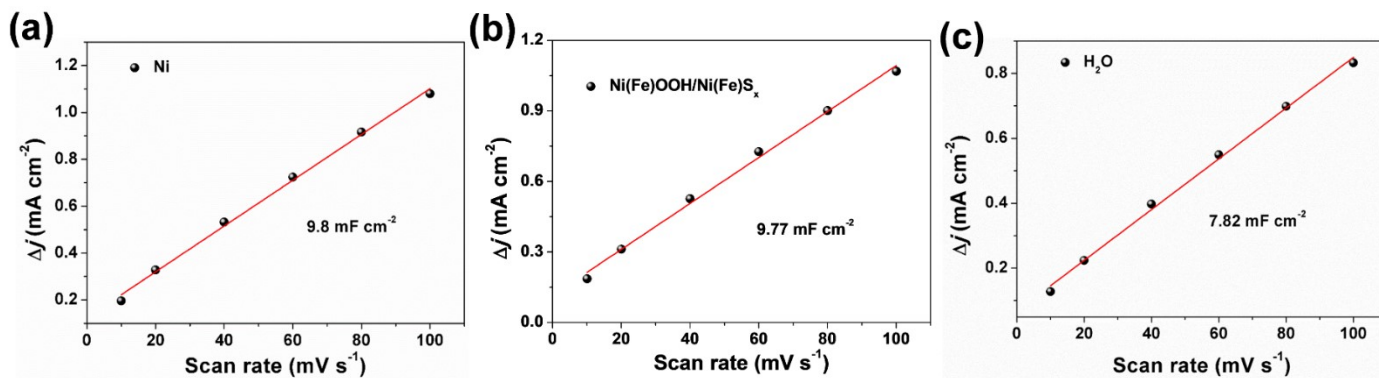

Figure s23 Electrochemical double-layer capacitances for (a) Ni(Fe)OOH/Ni(Fe)S<sub>x</sub>-Ni, (b) Ni(Fe)OOH/Ni(Fe)S<sub>x</sub>, and (c) Ni(Fe)OOH/Ni(Fe)S<sub>x</sub>-H<sub>2</sub>O.

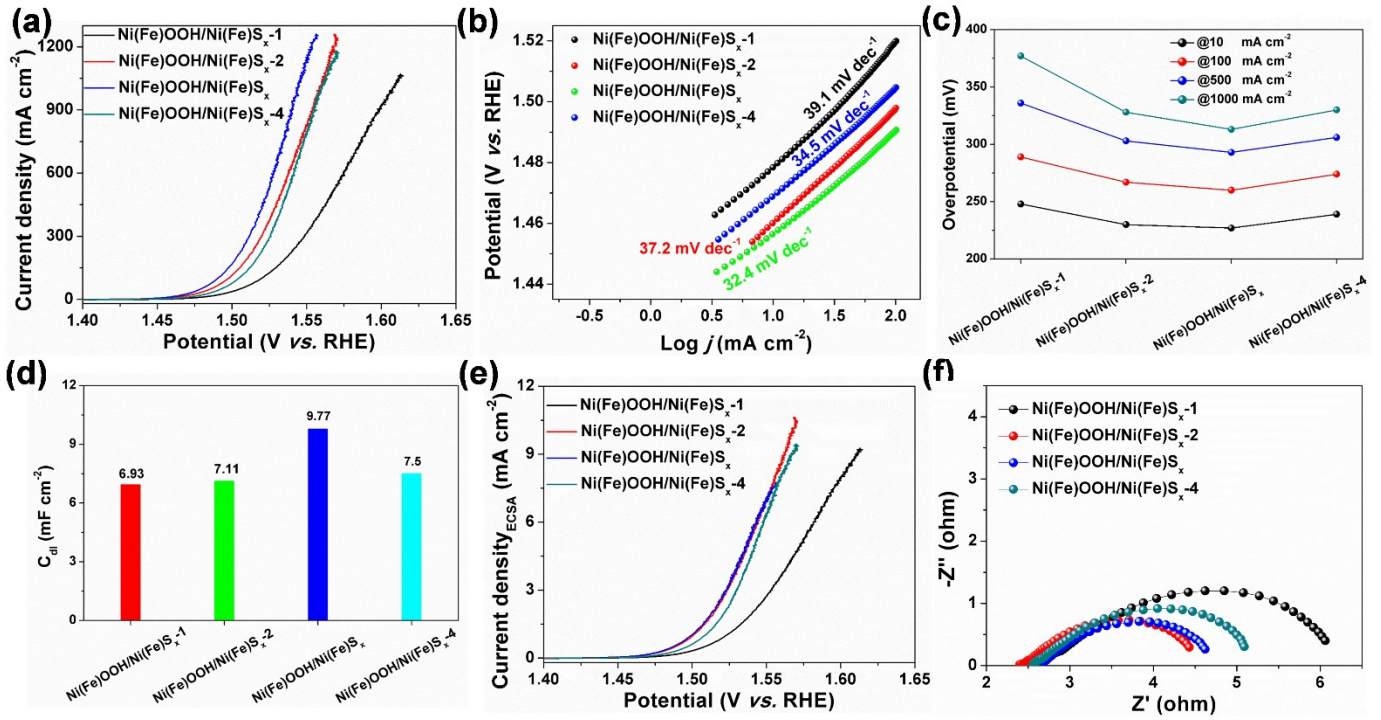

Figure s24 (a) OER polarization curves with iR-compensation and (b) corresponding Tafel slopes of various samples; (c) Overpotentials at 10, 100, 500, and 1000 mA cm<sup>-2</sup>; (d) double-layer capacitances; (e) normalized OER polarization curves; (f) electrochemical impedance spectroscopy.



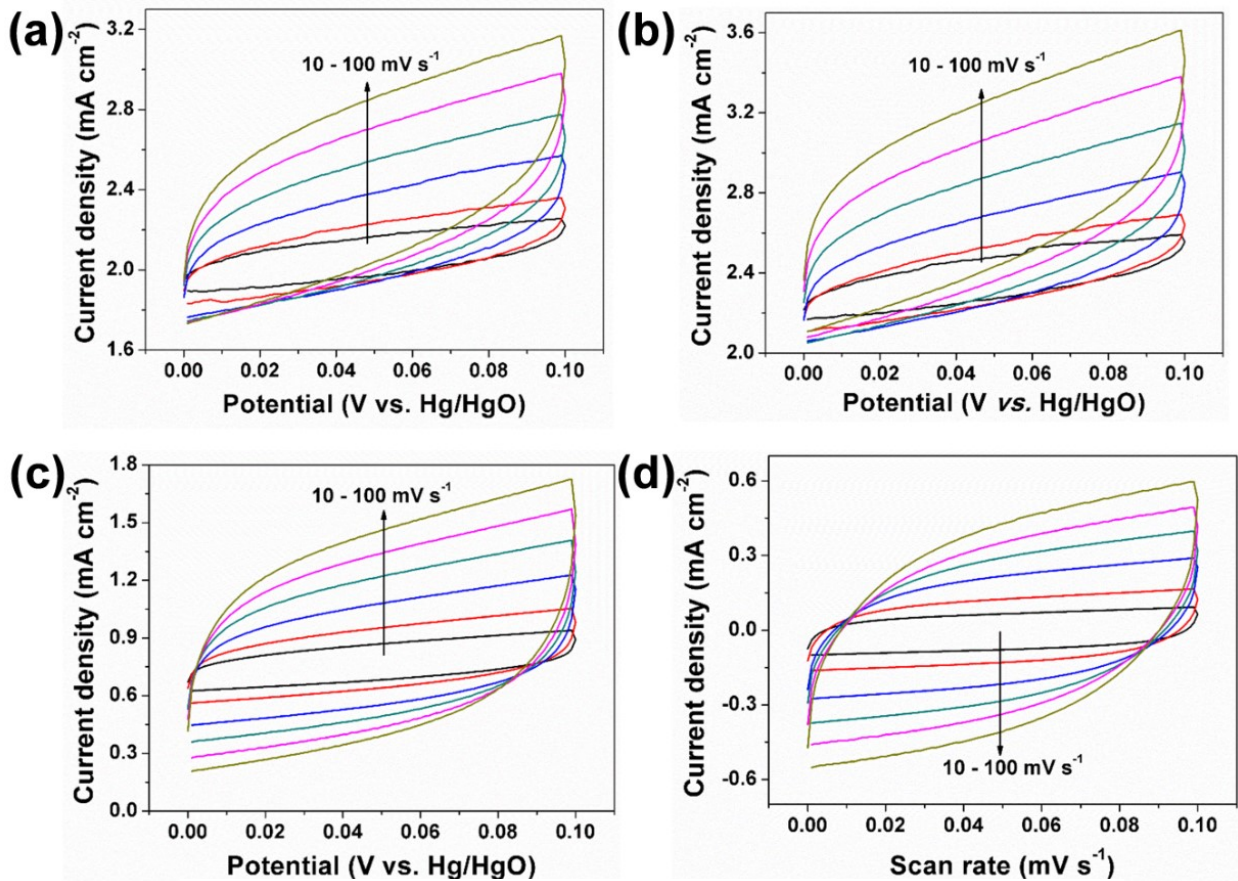

Figure s25 Cyclic voltammograms measured at different scan rates for (a) Ni(Fe)OOH/Ni(Fe)S<sub>x</sub>-1, (b) Ni(Fe)OOH/Ni(Fe)S<sub>x</sub>-2, (c) Ni(Fe)OOH/Ni(Fe)S<sub>x</sub>, and (d) Ni(Fe)OOH/Ni(Fe)S<sub>x</sub>-4.

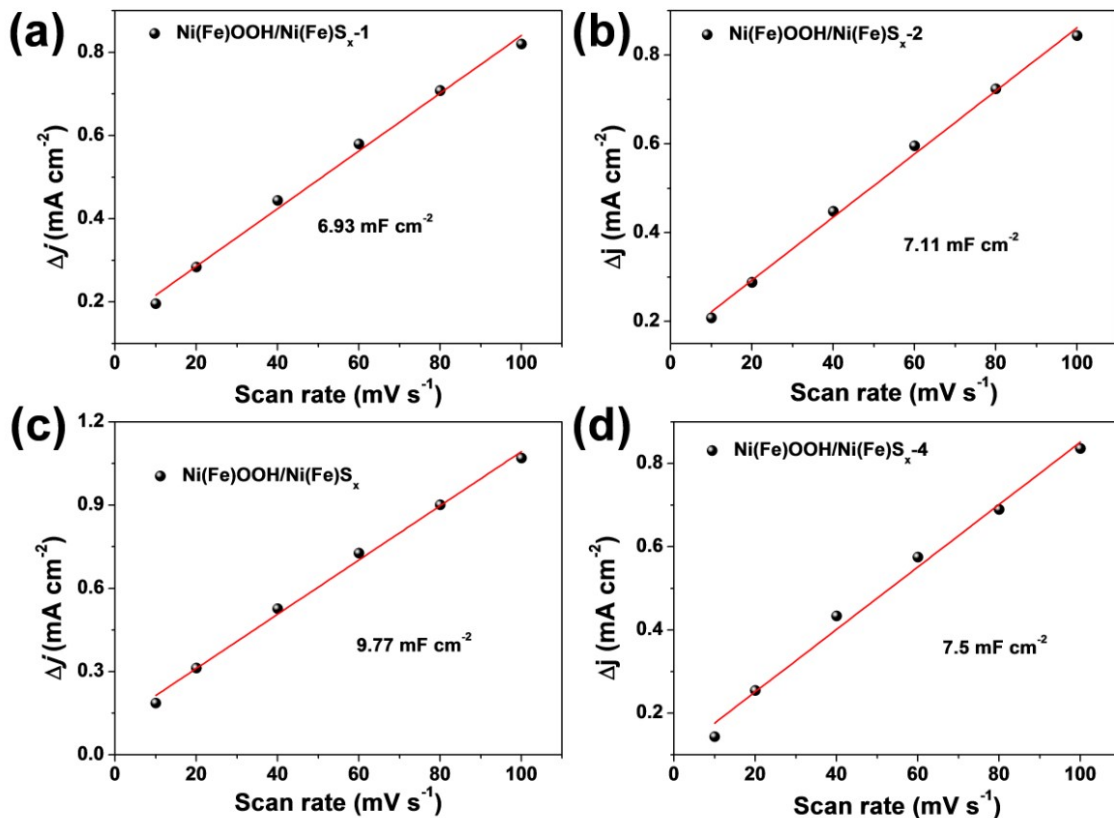

Figure s26 Electrochemical double-layer capacitances for (a) Ni(Fe)OOH/Ni(Fe)S<sub>x</sub>-1, (b) Ni(Fe)OOH/Ni(Fe)S<sub>x</sub>-2, (c) Ni(Fe)OOH/Ni(Fe)S<sub>x</sub>, and (d) Ni(Fe)OOH/Ni(Fe)S<sub>x</sub>-4.

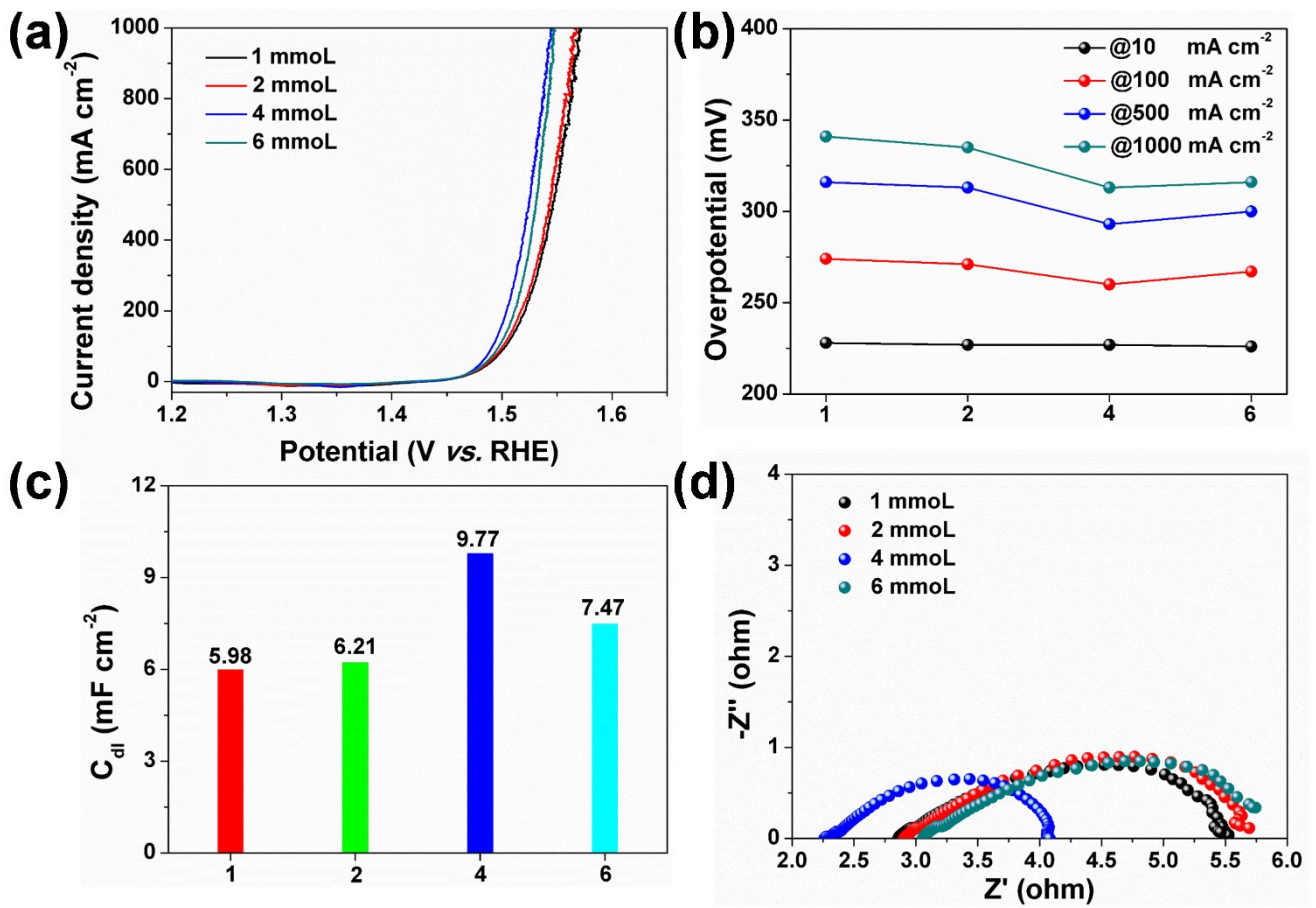

Figure s27 (a) OER polarization curves with iR-compensation and (b) Overpotentials at 10, 100, 500, and 1000 mA cm<sup>-2</sup>. (c) double-layer capacitances; (d) electrochemical impedance spectroscopy.

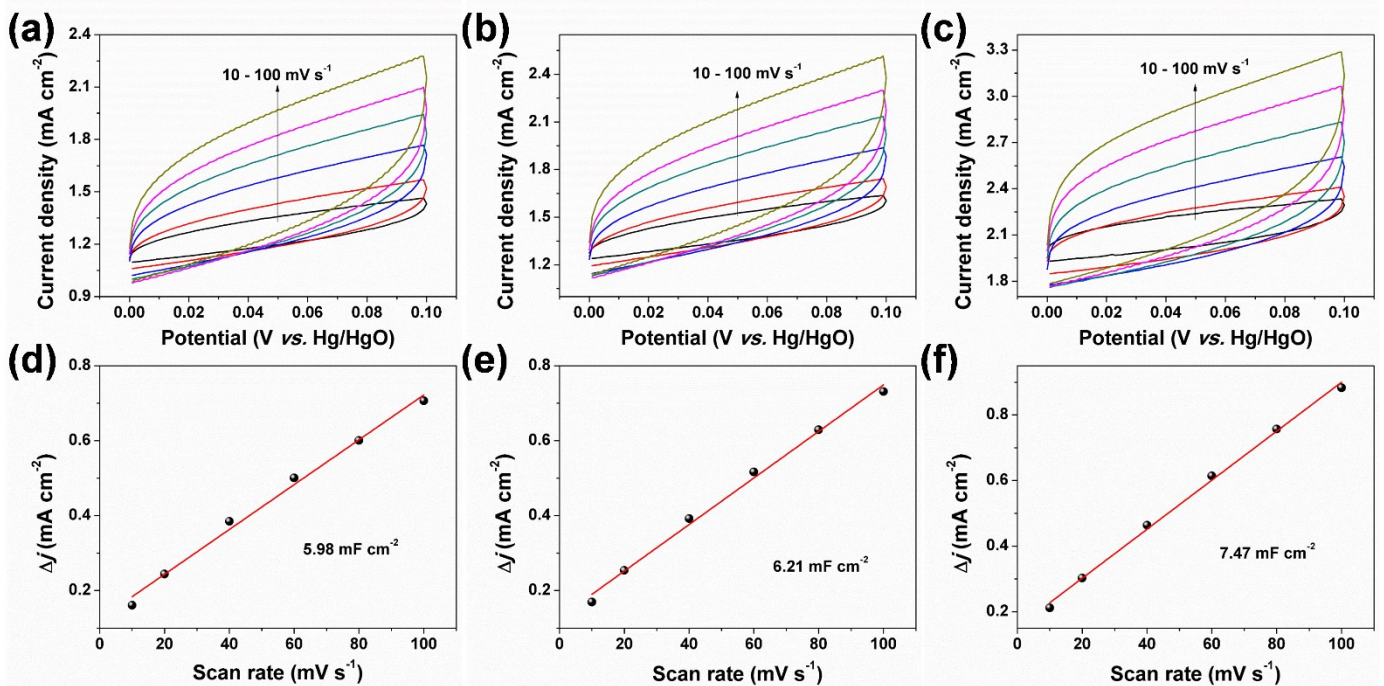

Figure s28 Cyclic voltammetry curves measured at different scan rates for (a) Ni(Fe)OOH/Ni(Fe)S<sub>x</sub>-01, (b) Ni(Fe)OOH/Ni(Fe)S<sub>x</sub>-02, and (c) Ni(Fe)OOH/Ni(Fe)S<sub>x</sub>-06.



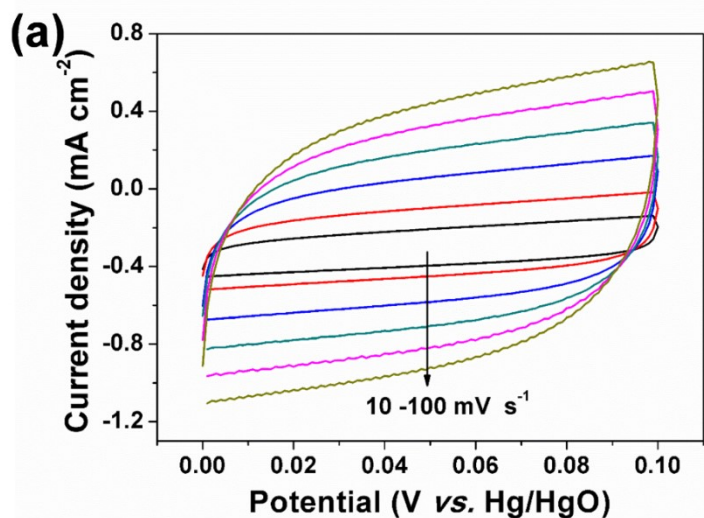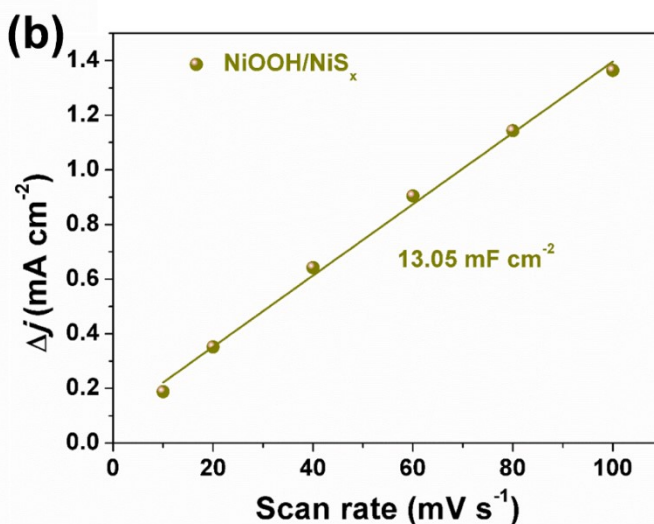

Figure s29 Cyclic voltammograms measured at different scan rates (a) and corresponding electrochemical double-layer capacitances (b) for NiOOH/ $\text{Ni}_x$ .

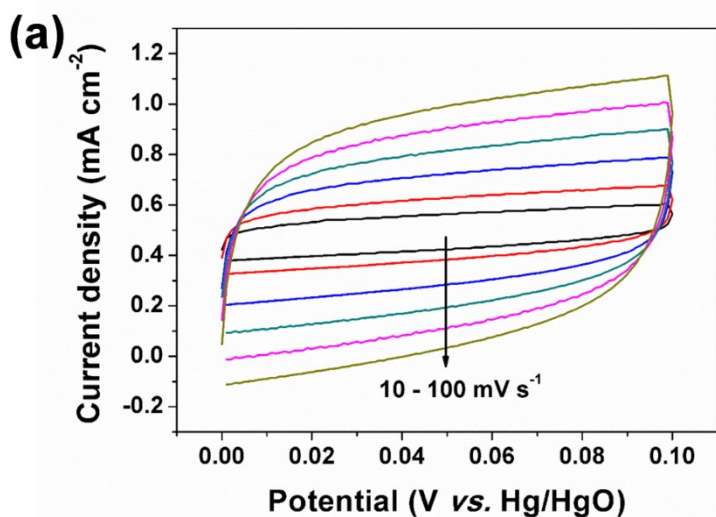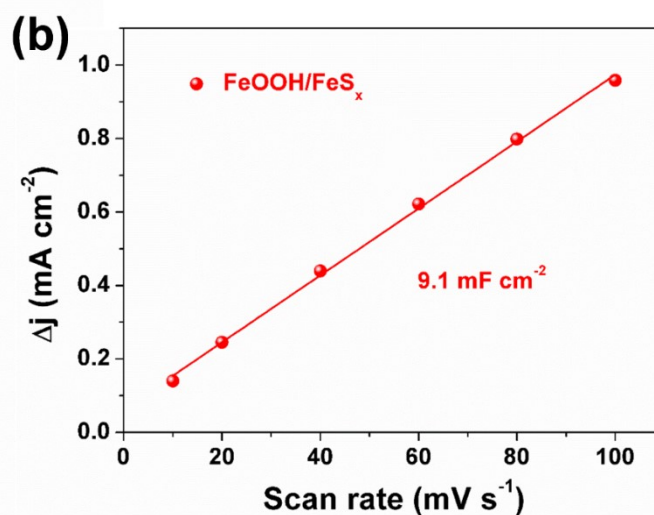

Figure s30 Cyclic voltammograms measured at different scan rates (a) and corresponding electrochemical double-layer capacitances (b) for FeOOH/ $\text{FeS}_x$ .

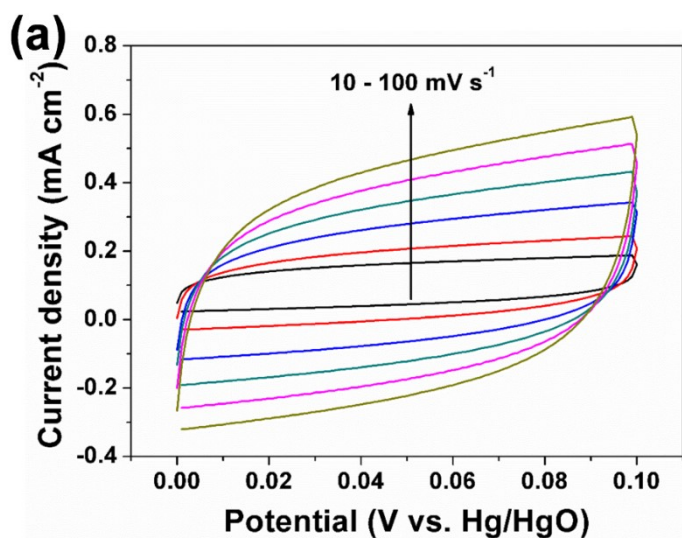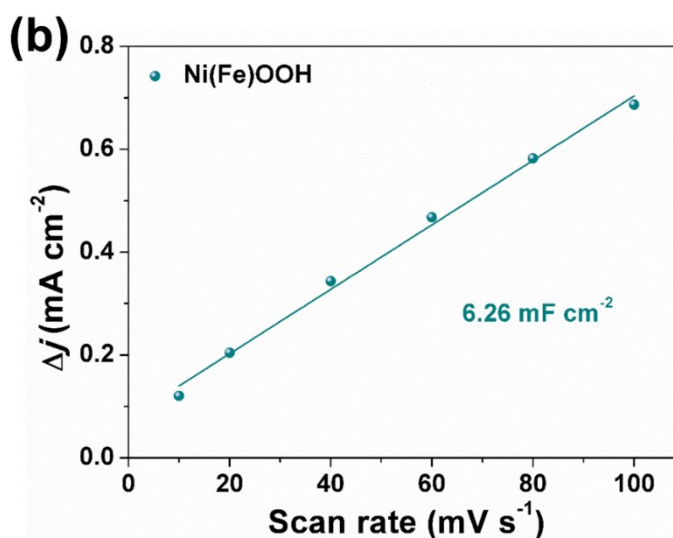

Figure s31 Cyclic voltammograms measured at different scan rates (a) and corresponding electrochemical double-layer capacitances (b) for Ni(Fe)OOH.

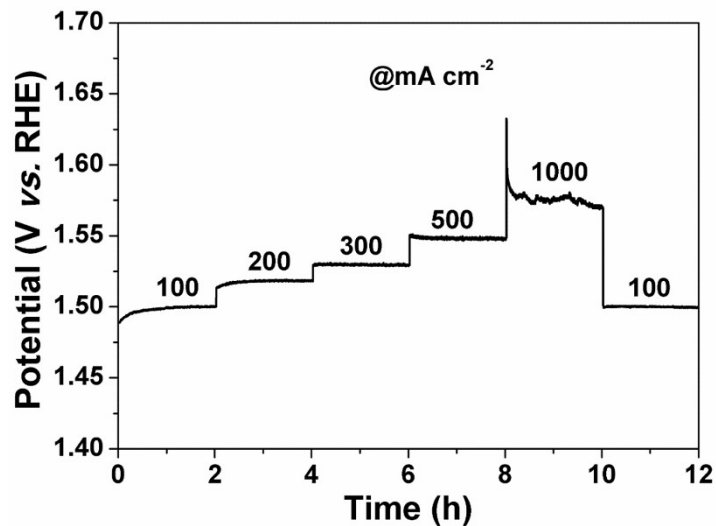

Figure 32 Multistep chronopotentiometric test at various current densities.

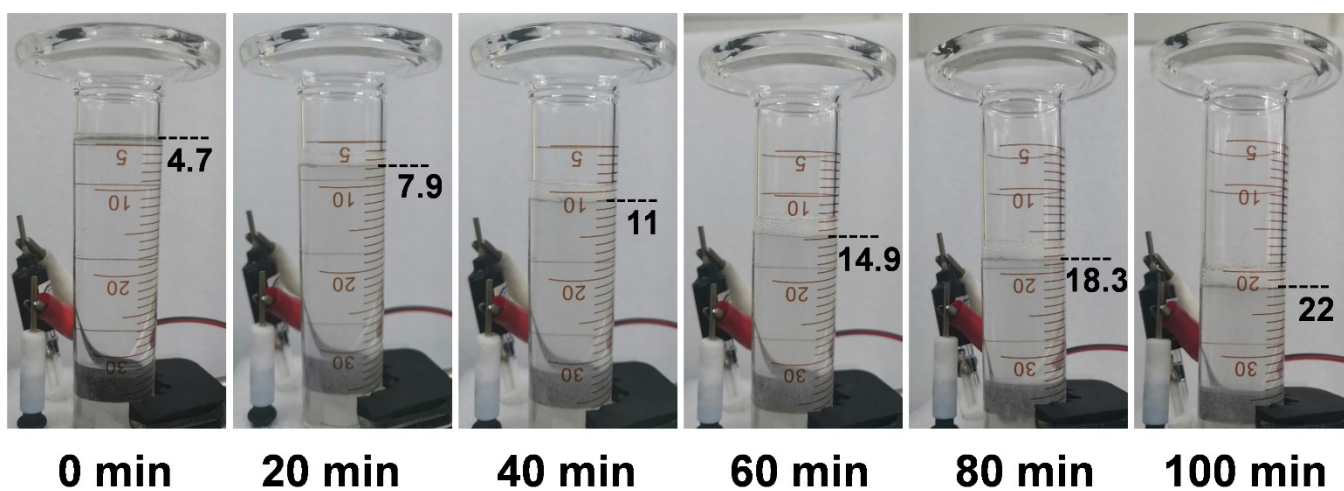

Figure 33 Photograph of the home-made setup for measuring O<sub>2</sub> generated from the Ni(Fe)OOH/Ni(Fe)S<sub>x</sub> electrode at a current density of 50 mA cm<sup>-2</sup>.

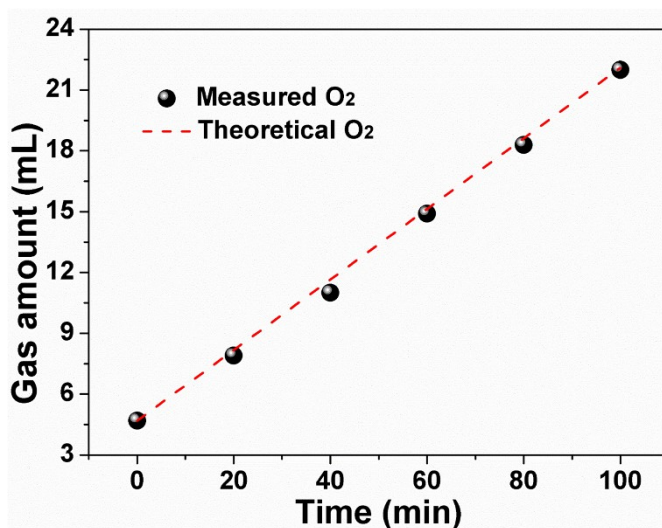

Figure 34 Experimental and theoretical amounts of O<sub>2</sub> by the Ni(Fe)OOH/Ni(Fe)S<sub>x</sub> electrode at a current density of 50 mA cm<sup>-2</sup>.

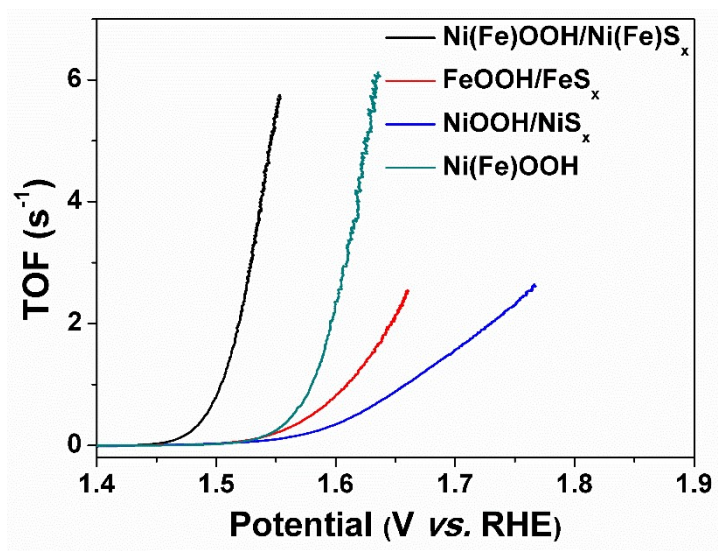

Figure 35 TOF curves of various samples.

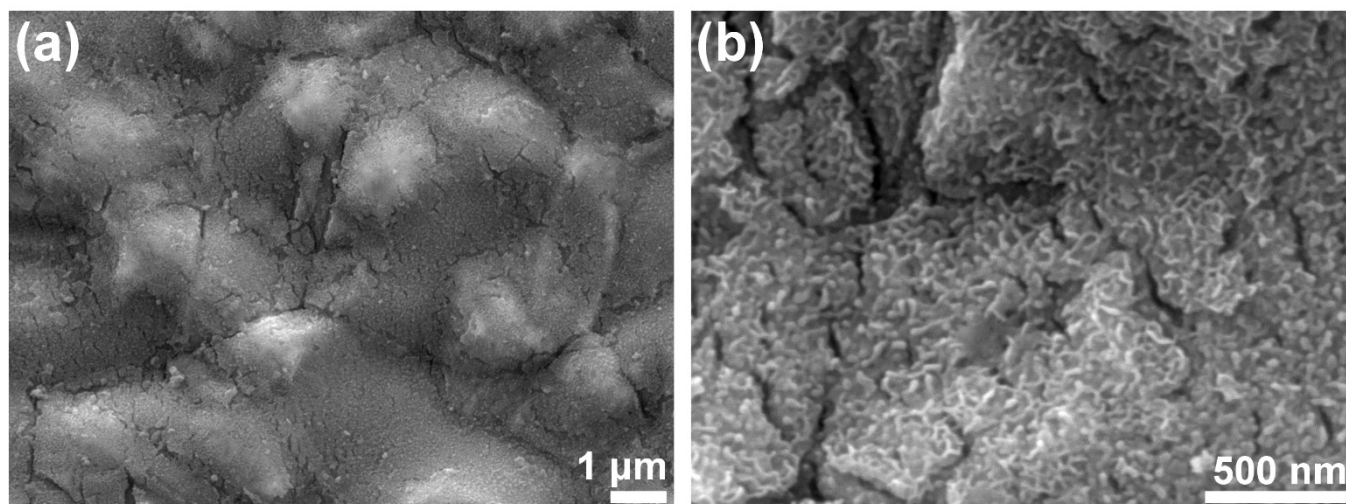

Figure 36 SEM images of  $\text{Ni(Fe)OOH/Ni(Fe)S}_x$  after OER stability testing in 1 M KOH aqueous solution.



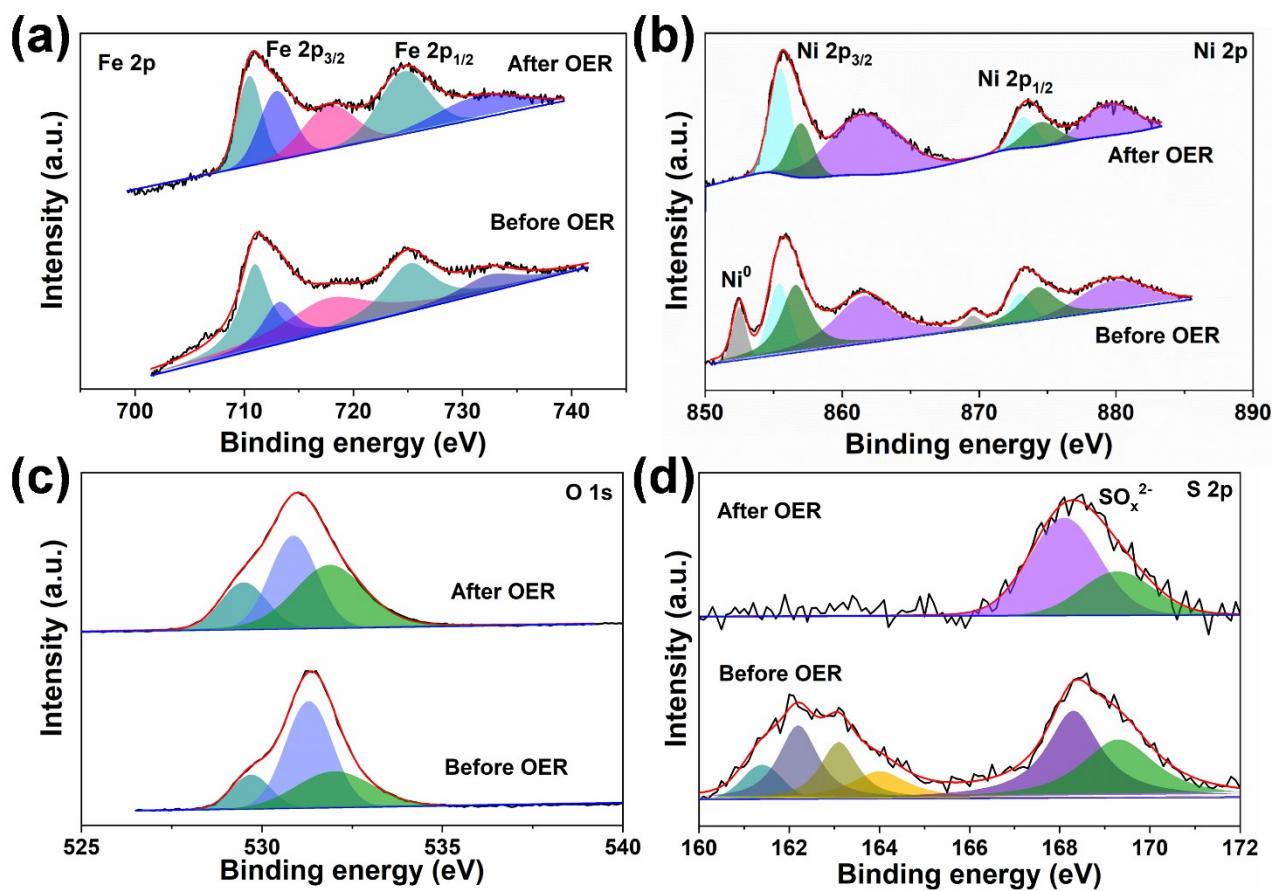

Figure 37 High-resolution XPS spectra of (a) Fe 2p, (b) Ni 2p, (c) O 1s, and (d) S 2p for Ni(Fe)OOH/Ni(Fe)S<sub>x</sub> before and after OER stability testing in 1 M KOH aqueous solution.

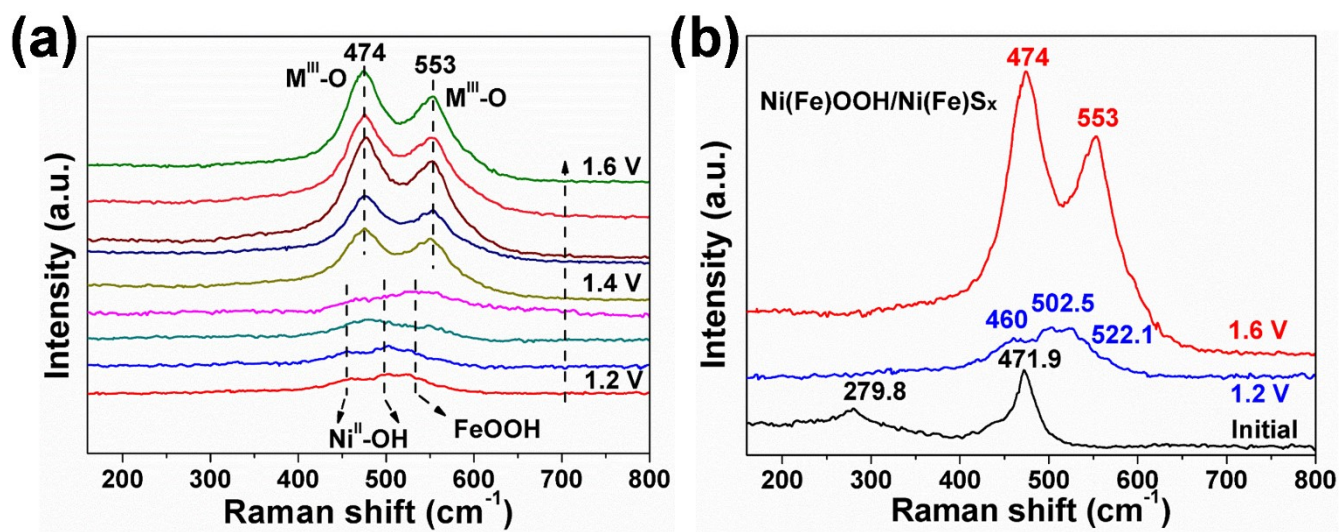

Figure 38 (a) *In situ* Raman spectra collected from Ni(Fe)OOH/Ni(Fe)S<sub>x</sub> during OER process in 1 M KOH at various potentials vs. RHE; (b) Raman spectra collected under initial and specific potentials vs. RHE.

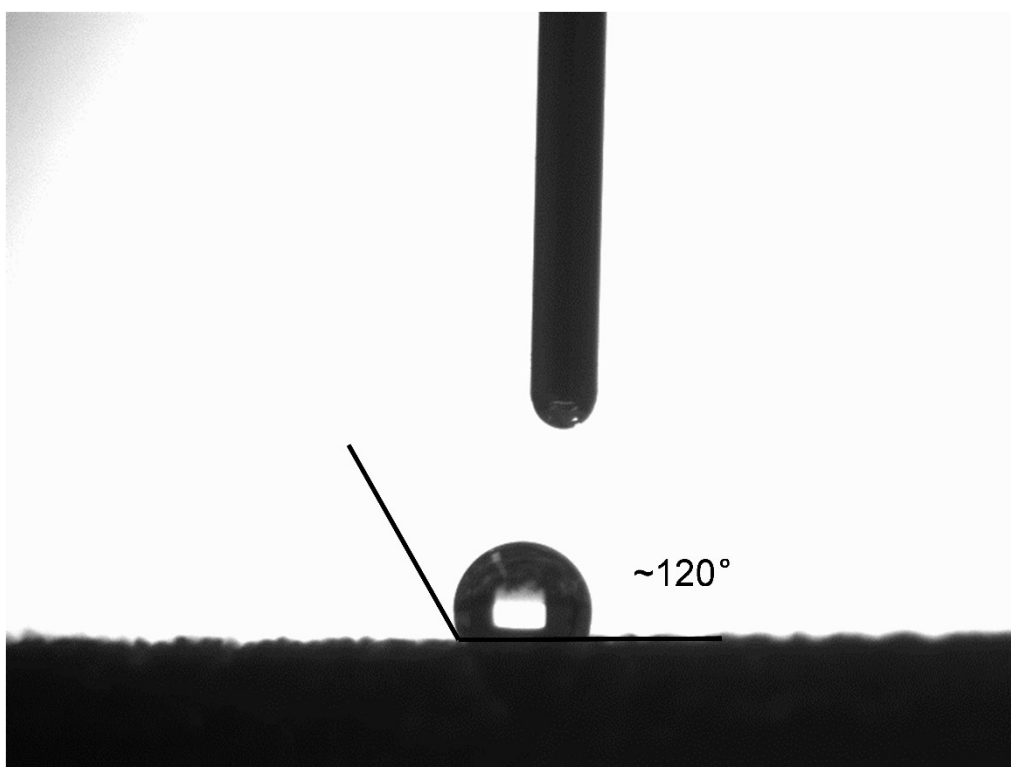

Figure s39 Contact angle measurement of NiFe foam.

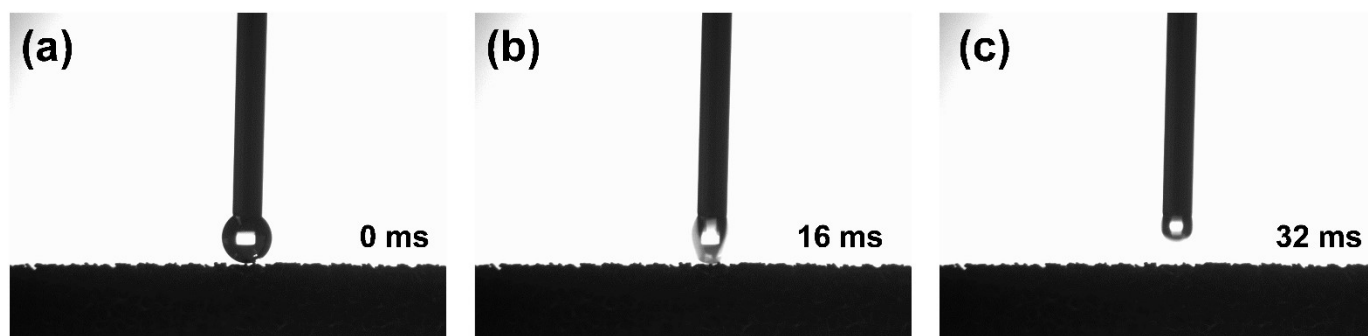

Figure s40 Contact angle measurement of Ni(Fe)OOH/Ni(Fe) $S_x$  nanosheets array, and the contact angles of the Ni(Fe)OOH/Ni(Fe) $S_x$  is about  $0^\circ$ .

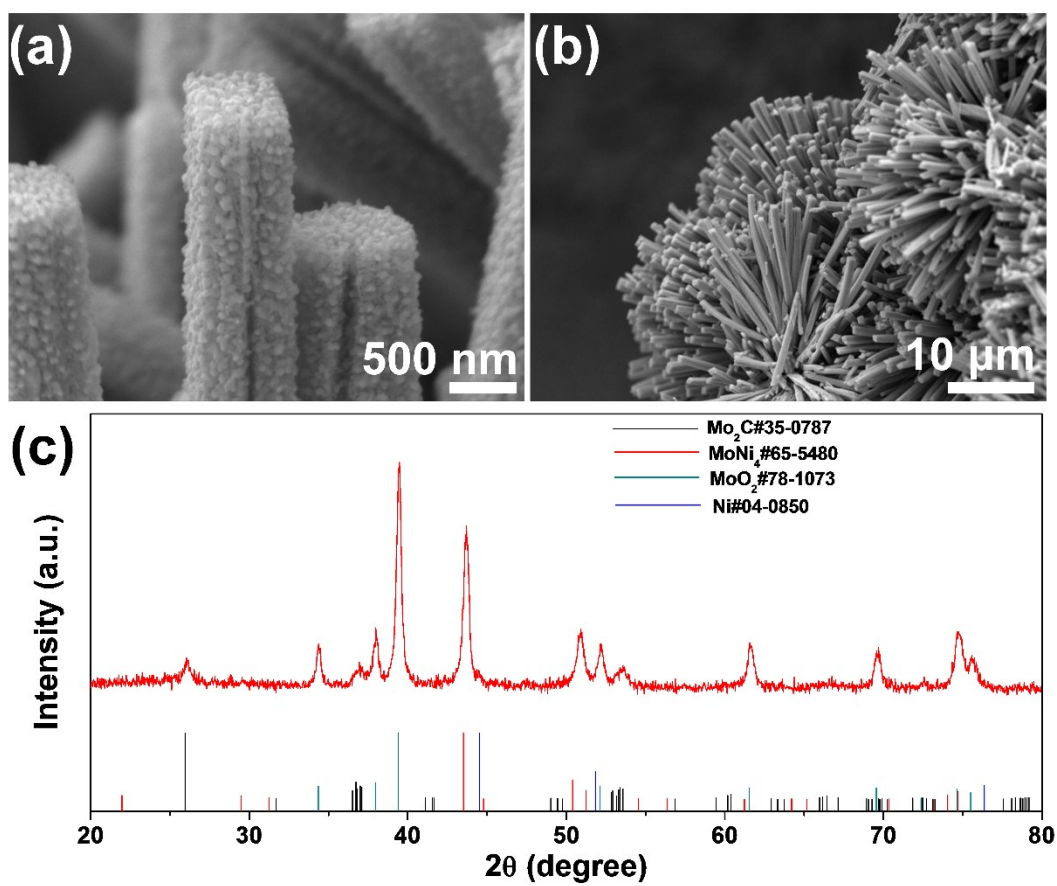

Figure s41 (a), (b) SEM images and (c) XRD pattern of the Mo<sub>2</sub>C/MoO<sub>2</sub>/MoNi<sub>4</sub>.

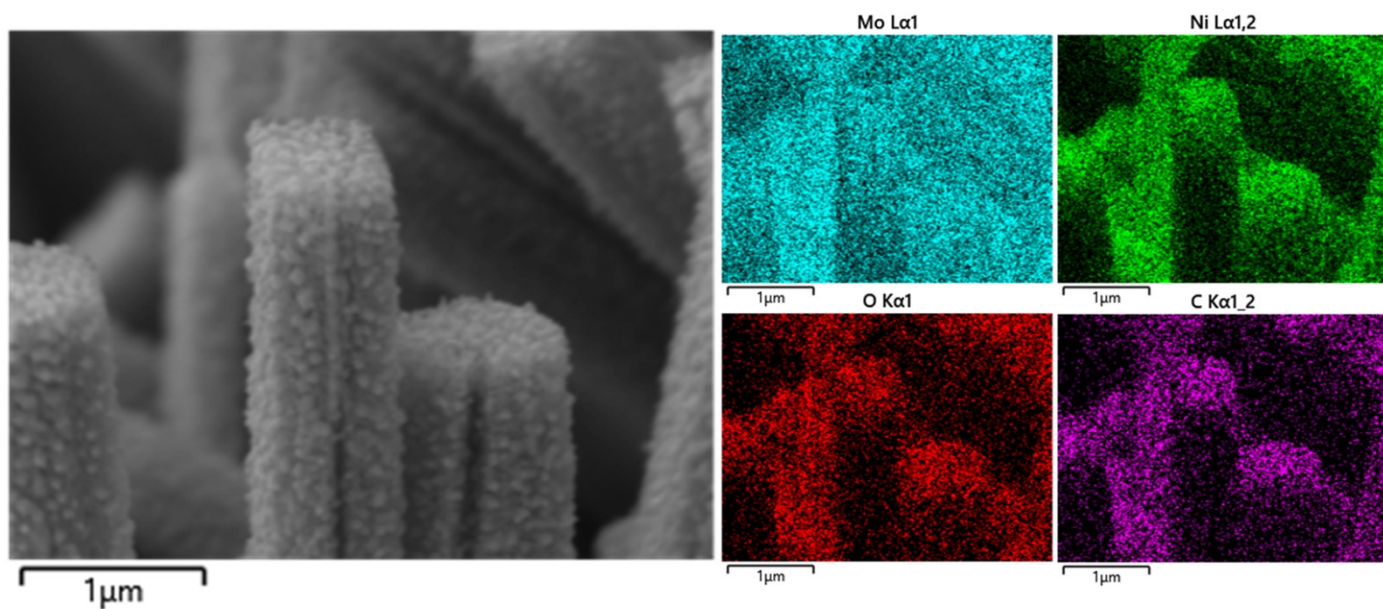

Figure s42 Elemental mapping images of Mo<sub>2</sub>C/MoO<sub>2</sub>/MoNi<sub>4</sub>.

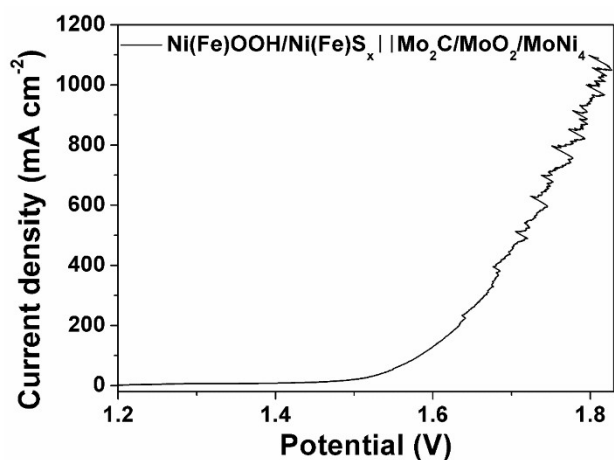

| Current density (mA cm <sup>-2</sup> ) | Potential (V) |
|----------------------------------------|---------------|
| $\eta = 10$                            | 1.438         |
| $\eta = 100$                           | 1.583         |
| $\eta = 500$                           | 1.707         |
| $\eta = 1000$                          | 1.809         |

Figure s43 Polarization curves using Ni(Fe)OOH/Ni(Fe)S<sub>x</sub> and Mo<sub>2</sub>C/MoO<sub>2</sub>/MoNi<sub>4</sub> as the cathode and anode, respectively, and corresponding the required potential at current density of 10, 100, 500, and 1000 mA cm<sup>-2</sup> in 1M KOH aqueous solution at room temperature.

Table s1. Comparison of OER performances in 1 M KOH solution for Ni(Fe)OOH/Ni(Fe)S<sub>x</sub> with other electrodes.

| OER catalyst                         | $\eta_{10}$ (mV) | Tafel slope (mV dec <sup>-1</sup> ) | Reference                                                   |
|--------------------------------------|------------------|-------------------------------------|-------------------------------------------------------------|
| Ni(Fe)OOH/Ni(Fe)S <sub>x</sub>       | 227              | 32.4                                | This work                                                   |
| FeOOH/Ni <sub>3</sub> N              | 244              | 67                                  | <i>Applied Catalysis B: Environmental</i> 269 (2020) 118600 |
| Co-Cu@GDY                            | 234              | 51.7                                | <i>Nano Energy</i> 74 (2020) 104852                         |
| FeNi <sub>2</sub> S <sub>4</sub>     | 250              | 62                                  | <i>Nano Energy</i> 81 (2021) 105619                         |
| L-Co <sub>3</sub> O <sub>4</sub> NSs | 290              | 76                                  | <i>Nano Energy</i> 83 (2021) 105800                         |
| O-CoP-2                              | 310              | 83.5                                | <i>Adv. Funct. Mater.</i> <b>2019</b> , 1905252             |
| Co/TaS <sub>2</sub> -3               | 330              | 70                                  | <i>ACS Nano</i> 2021, 15, 7105–7113                         |
| Co <sub>x</sub> (V <sub>1-x</sub> )  | 282              | 56                                  | <i>Adv. Energy Mater.</i> <b>2019</b> , 1903571             |



|                                                     |       |      |                                                             |
|-----------------------------------------------------|-------|------|-------------------------------------------------------------|
| Co <sub>0.85</sub> Se <sub>1-x</sub> @C             | 231   | 57   | <i>Adv. Mater.</i> <b>2021</b> , 2007523                    |
| CoP-InNC@CNT                                        | 270   | 84   | <i>Adv. Sci.</i> <b>2020</b> , 7, 1903195                   |
| NiFe-MOF/G                                          | 258   | 49   | <i>Adv. Energy Mater.</i> <b>2021</b> , 2003759             |
| MOF-FeCo(1:2)                                       | 238   | 52   | <i>Angew.Chem.</i> 2021,133,12204–12209                     |
| Fe <sub>0.4</sub> Co <sub>0.6</sub> Se <sub>2</sub> | 270   | 36   | <i>Energy Environ. Sci.</i> , 2021, 14, 365--373            |
| 30%Ce-Ni-Fe-LDH                                     | 242   | 34   | <i>Energy Environ. Sci.</i> , 2020, 13, 2949--2956          |
| EO Co <sub>3</sub> Mo/Cu                            | 261   | 82   | <i>Nat Commun</i> <b>11</b> , 2940 (2020)                   |
| FeNiCoCrMn-G                                        | 229   | 40   | <i>Adv. Sci.</i> <b>2021</b> , 2002446                      |
| EA-Cu@Fe@Ni                                         | 240   | 47   | <i>Nano Energy</i> 81 (2021) 105644                         |
| CoSAs-MoS <sub>2</sub> /TiN NRs                     | 340.6 | 73.5 | <i>Adv. Funct. Mater.</i> <b>2021</b> , 2100233             |
| IrCo@NC-850                                         | 302   | 52   | <i>Adv. Funct. Mater.</i> <b>2021</b> , 2101797             |
| Ag@Co(OH) <sub>x</sub> /CC                          | 250   | 76   | <i>Angew. Chem. Int. Ed.</i> <b>2020</b> , 59, 7245-7250    |
| CoS/MoS <sub>2</sub>                                | 281   | 79   | <i>Chem. Commun.</i> , <b>2021</b> , 57, 4847-4850          |
| Ni <sub>3</sub> FeN                                 | 259   | 54   | <i>Nano-Micro Lett.</i> (2020) 12:79                        |
| NiCo <sub>2</sub> S <sub>4</sub> NW/NF              | 260   | 40.1 | <i>Adv. Funct. Mater.</i> <b>2016</b> , 26, 4661 – 4672     |
| r-FeOOH/NF-6M                                       | 286   | 51   | <i>Adv. Mater.</i> <b>2021</b> , 2005587                    |
| Co <sub>5</sub> Fe <sub>3</sub> Cr <sub>2</sub>     | 232   | 31   | <i>Adv. Energy Mater.</i> <b>2021</b> , 2003412             |
| FeOOH(Se)/IF                                        | 287   | 54   | <i>J. Am. Chem. Soc.</i> 2019, 141, 7005–7013               |
| Ni-CoP-5%                                           | 290   | 66   | <i>Nano Lett.</i> 2021, 21, 823–832                         |
| NiFe LDH/NF-IH                                      | 246   | 46.6 | <i>Adv. Funct. Mater.</i> <b>2021</b> , 2009580             |
| NiFeV-LDH                                           | 287   | 53.7 | <i>Adv. Funct. Mater.</i> <b>2021</b> , 2009743             |
| Fe-x-Co <sub>9</sub> S <sub>8</sub>                 | 255   | 49   | <i>Adv. Energy Mater.</i> <b>2021</b> , 11, 2003023         |
| NiCo <sub>2</sub> S <sub>4</sub> @NiFe LDH          | 287   | 86.4 | <i>Applied Catalysis B: Environmental</i> 286 (2021) 119869 |



Table s2. Comparison of OER stability of representative electrocatalysts in 1 M KOH solution.

| Electrocatalyst                                                         | Current density         | Time    | Reference                                                   |
|-------------------------------------------------------------------------|-------------------------|---------|-------------------------------------------------------------|
| Ni(Fe)OOH/Ni(Fe)S <sub>x</sub>                                          | 100 mA cm <sup>-2</sup> | 100 h   | This work                                                   |
| H <sub>2</sub> PO <sub>4</sub> <sup>2-</sup> /FeNi-LDH-V <sub>2</sub> C | 10 mA cm <sup>-2</sup>  | 30000 s | <i>Applied Catalysis B: Environmental</i> 297 (2021) 120474 |
| NiFe-PBA-gel-cal                                                        | 50 mA cm <sup>-2</sup>  | 50 h    | <i>Adv. Sci.</i> <b>2022</b> , 2200146                      |
| EE-NiFe-LDH                                                             | 100 mA cm <sup>-2</sup> | 24 h    | <i>Applied Catalysis B: Environmental</i> 298 (2021) 120580 |
| NiFeCoMnAl                                                              | 10 mA cm <sup>-2</sup>  | 50 h    | <i>Applied Catalysis B: Environmental</i> 301 (2022) 120764 |
| RuFeO <sub>x</sub>                                                      | 10 mA cm <sup>-2</sup>  | 10 h    | <i>Adv. Funct. Mater.</i> <b>2021</b> , 31, 2101405         |
| La(CrMnFeCo <sub>2</sub> Ni)O <sub>3</sub>                              | 10 mA cm <sup>-2</sup>  | 50 h    | <i>Adv. Funct. Mater.</i> <b>2021</b> , 31, 2101632         |
| PDANF                                                                   | 23 mA cm <sup>-2</sup>  | 100 h   | <i>Applied Catalysis B: Environmental</i> 302 (2022) 120833 |
| a-LNFBPO                                                                | 10 mA cm <sup>-2</sup>  | 300 h   | <i>Adv. Energy Mater.</i> <b>2021</b> , 11, 2100624         |
| NiFe-MOF/G                                                              | 10 mA cm <sup>-2</sup>  | 32 h    | <i>Adv. Energy Mater.</i> <b>2021</b> , 11, 2003759         |
| CeO <sub>2</sub> /CoS <sub>1.97</sub>                                   | 10 mA cm <sup>-2</sup>  | 50 h    | <i>Adv. Mater.</i> <b>2021</b> , 33, 2102593                |
| Co <sub>0.85</sub> Se <sub>1-x</sub> @C                                 | 20 mA cm <sup>-2</sup>  | 50 h    | <i>Adv. Mater.</i> <b>2021</b> , 33, 2007523                |
| FeNiCoCrMn-G                                                            | 100 mA cm <sup>-2</sup> | 36 h    | <i>Adv. Sci.</i> <b>2021</b> , 8, 2002446                   |

Table s3. Comparison of OWS performance in 1 M KOH for the Ni(Fe)OOH/Ni(Fe)S<sub>x</sub>||Mo<sub>2</sub>C/MoO<sub>2</sub>/MoNi<sub>4</sub> with other electrodes.

| OWS catalyst                                                                           | Cell voltage (η <sub>10</sub> ) | Cell voltage (η <sub>100</sub> ) | Reference                                                          |
|----------------------------------------------------------------------------------------|---------------------------------|----------------------------------|--------------------------------------------------------------------|
| Ni(Fe)OOH/Ni(Fe)S <sub>x</sub>   Mo <sub>2</sub> C/MoO <sub>2</sub> /MoNi <sub>4</sub> | 1.42 V                          | 1.58 V                           | This work                                                          |
| Ru1/D-NiFe LDH                                                                         | 1.44                            | 1.54                             | <i>Nat Commun</i> <b>12</b> , 4587 (2021)                          |
| NiFeRh-LDH                                                                             | 1.455                           | 1.565                            | <i>Applied Catalysis B: Environmental</i> <b>284</b> (2021) 119740 |
| Co-Fe-P                                                                                | 1.46                            | —                                | <i>Chemical Engineering Journal</i> <b>405</b> (2021) 127002       |
| IrNi-FeNi <sub>3</sub>                                                                 | 1.47                            | —                                | <i>Applied Catalysis B: Environmental</i> <b>286</b> (2021) 119881 |
| Co <sub>3</sub> O <sub>4</sub> -Ag                                                     | 1.49                            | —                                | <i>Applied Catalysis B: Environmental</i> <b>299</b> (2021) 120658 |
| MoS <sub>2</sub> -Mo <sub>2</sub> C                                                    | 1.49                            | —                                | <i>Nano Energy</i> <b>88</b> (2021) 106277                         |
| Ni <sub>3</sub> Se <sub>2</sub> @NiOOH                                                 | 1.52                            | —                                | <i>Sci China Mater</i> 2019, 62(8): 1096–1104                      |
| NiCo(-)//NiFe(+)                                                                       | 1.52                            | 1.64                             | <i>Applied Catalysis B: Environmental</i> <b>288</b> (2021) 120002 |
| NiMnFeMo                                                                               | 1.54                            | —                                | <i>Chemical Engineering Journal</i> <b>404</b> (2021) 126530       |
| CoMoN <sub>x</sub> -500                                                                | 1.55                            | —                                | <i>Chemical Engineering Journal</i> <b>411</b> (2021) 128433       |
| Fe-Ni <sub>5</sub> P <sub>4</sub> /NiFeOH                                              | 1.55                            | —                                | <i>Applied Catalysis B: Environmental</i> <b>291</b> (2021) 119987 |
| NiP <sub>2</sub> /NiSe <sub>2</sub>                                                    | 1.56                            | 1.8                              | <i>Applied Catalysis B: Environmental</i> <b>282</b> (2021) 119584 |
| E-NiFeOOH                                                                              | 1.59                            | —                                | <i>J. Mater. Chem. A</i> , 2021, 9, 20058                          |
| Ni <sub>3</sub> S <sub>2</sub> /FeS                                                    | 1.61                            | —                                | <i>Journal of Power Sources</i> <b>487</b> (2021) 229408           |
| Te/Fe-NiOOH                                                                            | 1.65                            | —                                | <i>ACS Appl. Mater. Interfaces</i> 2021, 13, 10972–10978           |
| P@pCoPc-1/Co <sub>3</sub> O <sub>4</sub>  CC                                           | 1.672                           | —                                | <i>Adv. Funct. Mater.</i> <b>2021</b> , 31, 2103290                |
| CoP@FeCoP                                                                              | 1.68                            | —                                | <i>Chemical Engineering Journal</i> <b>403</b> (2021) 126312       |
| CF/VMFO                                                                                | 1.37                            | 1.59                             | <i>Nat Commun</i> <b>12</b> , 1380 (2021)                          |

|                                                                  |      |      |                                                                    |
|------------------------------------------------------------------|------|------|--------------------------------------------------------------------|
| FeP/Ni <sub>2</sub> P                                            | —    | 1.6  | <i>Nat Commun</i> <b>9</b> , 2551 (2018)                           |
| Ni <sub>2</sub> P/Ni <sub>3</sub> S <sub>2</sub>                 | 1.5  | 1.62 | <i>Nano Energy</i> <b>51</b> (2018) 26 – 36                        |
| Ni <sub>0.5</sub> Mo <sub>0.5</sub> OSe                          | 1.51 | 1.63 | <i>Applied Catalysis B: Environmental</i> <b>286</b> (2021) 119909 |
| NiFeP-MoO <sub>2</sub>                                           | 1.41 | 1.65 | <i>Chemical Engineering Journal</i> <b>409</b> (2021) 128161       |
| Fe-FVO-60-act                                                    | 1.58 | 1.72 | <i>Chemical Engineering Journal</i> <b>416</b> (2021) 129165       |
| NiCoP                                                            | 1.59 | 1.73 | <i>Nanoscale</i> , 2021, 13, 14179                                 |
| CoS <sub>2</sub> /MoS <sub>2</sub>                               | 1.59 | 1.74 | <i>ChemSusChem</i> 2021, 14, 699 – 708                             |
| MoS <sub>2</sub> /Fe <sub>5</sub> Ni <sub>4</sub> S <sub>8</sub> | —    | 1.78 | <i>Adv. Mater.</i> <b>2018</b> , 30, 1803151                       |
| Ni-ZIF/Ni-B@NF-4                                                 | 1.54 | 1.78 | <i>Adv. Energy Mater.</i> <b>2020</b> , 10, 1902714                |
| Mo-Ni <sub>3</sub> S <sub>2</sub> /NixPy                         | 1.46 | 1.8  | <i>Adv. Energy Mater.</i> <b>2020</b> , 10, 1903891                |
| Ni <sub>3</sub> S <sub>2</sub> /FeNi <sub>2</sub> S <sub>4</sub> | 1.55 | 1.86 | <i>Chemical Engineering Journal</i> <b>427</b> (2022) 131944       |
| NiFe LDH@NiCoP/NF                                                | 1.57 | 1.9  | <i>Adv. Funct. Mater.</i> <b>2018</b> , 28, 1706847                |
| NiCo <sub>2</sub> S <sub>4</sub>                                 | 1.58 | 1.94 | <i>Adv. Funct. Mater.</i> <b>2019</b> , 29, 1807031                |

Table s4. Comparison of OWS stability of representative electrocatalysts in 1 M KOH solution.

| OWS catalyst                                                                               | Current density         | Time  | Reference                                                   |
|--------------------------------------------------------------------------------------------|-------------------------|-------|-------------------------------------------------------------|
| Ni(Fe)OOH/Ni(Fe)S <sub>x</sub>   <br>Mo <sub>2</sub> C/MoO <sub>2</sub> /MoNi <sub>4</sub> | 100 mA cm <sup>-2</sup> | 100 h | This work                                                   |
| CoP@CoOOH                                                                                  | 10 mA cm <sup>-2</sup>  | 140 h | <i>Small</i> <b>2022</b> , 18, 2106012                      |
| Ni/CeO <sub>2</sub> @N-CNFs                                                                | 10 mA cm <sup>-2</sup>  | 100 h | <i>Small</i> <b>2022</b> , 18, 2106592                      |
| NCRO-4                                                                                     | 10 mA cm <sup>-2</sup>  | 200 h | <i>Applied Catalysis B: Environmental</i> 305 (2022) 121081 |
| Pt/C    vs-Ru-Ni <sub>9</sub> S <sub>8</sub>                                               | 10 mA cm <sup>-2</sup>  | 100 h | <i>Applied Catalysis B: Environmental</i> 310 (2022) 121356 |
| Ni <sub>2</sub> P-CuP <sub>2</sub>                                                         | 10 mA cm <sup>-2</sup>  | 40 h  | <i>ACS Nano</i> 2021, 15, 5586–5599                         |
| LIA-Ni-BDC    LIA-MIL-<br>101(Fe)                                                          | 50 mA cm <sup>-2</sup>  | 50 h  | <i>Adv. Funct. Mater.</i> <b>2021</b> , 31, 2102648         |
| Pd/NiFeO <sub>x</sub>                                                                      | 20 mA cm <sup>-2</sup>  | 50 h  | <i>Adv. Funct. Mater.</i> <b>2021</b> , 31, 2107181         |
| CoNiRu-NT                                                                                  | 50 mA cm <sup>-2</sup>  | 48 h  | <i>Adv. Mater.</i> <b>2022</b> , 34, 2107488                |
| NiFe-PBA-gel-cal                                                                           | 100 mA cm <sup>-2</sup> | 50 h  | <i>Adv. Sci.</i> <b>2022</b> , 2200146                      |
| IrO <sub>2</sub> /V <sub>2</sub> O <sub>5</sub>                                            | 10 mA cm <sup>-2</sup>  | 30 h  | <i>Adv. Sci.</i> <b>2022</b> , 2104636                      |
